# Supplementary material for: Integration Analysis of m6A-SNPs and eQTLs Associated With Sepsis Reveals Platelet Degranulation and Staphylococcus aureus Infection are Mediated by m6A mRNA Methylation
Source: Front Genet. 2020 Feb 26;11:7. doi: 10.3389/fgene.2020.00007 (PMC7054457; doi:10.3389/fgene.2020.00007)
Supplement: Supplementary file 1 [file Table_1.xlsx]

## Sheet: Table S1
Table S1.m6A-cis-eQTLs and m6A-trans-eQTLs
SNP	Chromosome	Position	Gene	p value	FDR
rs10239340	7	128668510	IRF5	5.18931e-65	4.21564e-58
rs9849087	3	121465220	GOLGB1	6.85963e-62	1.85752e-55
rs8070859	17	15887789	ZSWIM7	1.22225e-60	2.2781e-54
rs9891938	17	15915072	ZSWIM7	3.52494e-60	4.7726e-54
rs7313235	12	10132283	CLEC12A	1.14328e-58	1.16096e-52
rs2285583	17	15968143	ZSWIM7	7.67549e-58	6.92816e-52
rs7313235	12	10132283	CLEC12A	1.31411e-57	1.06754e-51
rs1039320	5	73927752	ENC1	1.63923e-56	1.02436e-50
rs4792717	17	15948430	ZSWIM7	3.99903e-56	2.1658e-50
rs3785628	17	15970682	ZSWIM7	3.99903e-56	2.1658e-50
rs7522860	1	156275281	PAQR6	4.87964e-56	2.47755e-50
rs11150882	17	259648	C17orf97	6.13709e-56	2.9327e-50
rs2025577	1	156314104	PAQR6	1.17413e-55	5.29906e-50
rs10474420	5	73934274	ENC1	1.83617e-55	7.85082e-50
rs7313235	12	10132283	CLEC12A	2.14873e-54	8.72782e-49
rs9884018	3	121563355	GOLGB1	1.58389e-52	5.84868e-47
rs10942714	5	73922463	ENC1	2.32049e-52	8.19607e-47
rs10239340	7	128668510	IRF5	2.92985e-51	9.15432e-46
rs6864196	5	73944444	ENC1	5.98201e-51	1.79986e-45
rs933489	1	156235120	PAQR6	5.71899e-50	1.60205e-44
rs7313235	12	10132283	CLEC12A	1.00537e-49	2.72245e-44
rs7522860	1	156275281	PAQR6	1.35674e-49	3.5554e-44
rs11150882	17	259648	C17orf97	2.1762e-49	5.52462e-44
rs2025577	1	156314104	PAQR6	9.14023e-49	2.25008e-43
rs7328733	13	33126737	PFAAP5	1.18421e-48	2.82947e-43
rs2025577	1	156314104	C1orf85	1.27656e-48	2.96298e-43
rs7522860	1	156275281	C1orf85	2.25322e-48	5.08458e-43
rs10079609	5	73918616	ENC1	2.32353e-48	5.10154e-43
rs1872241	6	41195903	TREML4	2.80867e-48	5.56509e-43
rs9369265	6	41196605	TREML4	2.80867e-48	5.56509e-43
rs2101269	6	41196727	TREML4	2.80867e-48	5.56509e-43
rs7769759	6	41197857	TREML4	2.80867e-48	5.56509e-43
rs639459	7	42951936	C7orf25	8.92754e-48	1.72678e-42
rs4360063	5	96293153	ERAP2	1.00739e-47	1.85994e-42
rs10044354	5	96320495	ERAP2	1.00739e-47	1.85994e-42
rs9349180	6	41185474	TREML4	1.13437e-47	2.04784e-42
rs1736219	17	17127471	COPS3	5.25266e-47	8.58719e-42
rs33953680	1	43296195	CCDC23	5.28526e-47	8.58719e-42
rs602524	7	42941854	C7orf25	8.34899e-47	1.30432e-41
rs661592	7	42952486	C7orf25	8.34899e-47	1.30432e-41
rs12459634	19	36230174	TMEM149	1.65982e-46	2.40784e-41
rs2871921	19	36232420	TMEM149	1.65982e-46	2.40784e-41
rs12578560	12	10160527	CLEC12A	2.26691e-46	3.23082e-41
rs8043	7	128607384	IRF5	3.6795e-46	5.0663e-41
rs323719	1	43270928	CCDC23	4.88559e-46	6.50641e-41
rs178787	17	16133044	ZSWIM7	1.02045e-45	1.33707e-40
rs2280714	7	128594725	IRF5	1.3464e-45	1.73616e-40
rs12578560	12	10160527	CLEC12A	1.79445e-45	2.20872e-40
rs10491104	17	15884561	ZSWIM7	3.83518e-45	4.51535e-40
rs933489	1	156235120	C1orf85	4.93163e-45	5.7233e-40
rs7957464	12	10104289	CLEC12A	3.24171e-44	3.55875e-39
rs933489	1	156235120	PAQR6	4.53315e-44	4.91013e-39
rs1968871	6	41185430	TREML4	4.71672e-44	5.04174e-39
rs9899002	17	15921419	ZSWIM7	5.12247e-44	5.26753e-39
rs2157992	17	15928885	ZSWIM7	5.12247e-44	5.26753e-39
rs9891379	17	15976558	ZSWIM7	5.12247e-44	5.26753e-39
rs3848662	19	36216056	TMEM149	6.13106e-44	6.22587e-39
rs12578560	12	10160527	CLEC12A	6.36834e-44	6.38698e-39
rs7332115	13	33147548	PFAAP5	8.47842e-44	8.35397e-39
rs7719705	5	96286286	ERAP2	8.53526e-44	8.35397e-39
rs758853	17	15903602	ZSWIM7	1.82482e-43	1.74403e-38
rs9649520	7	128672645	IRF5	2.81744e-43	2.60092e-38
rs10236569	7	128597587	IRF5	4.04912e-43	3.57542e-38
rs178791	17	16127206	ZSWIM7	6.1281e-43	5.353e-38
rs7957464	12	10104289	CLEC12A	1.2531e-42	1.07156e-37
rs1736200	17	17155873	COPS3	6.38368e-42	5.2383e-37
rs11210712	1	43232798	CCDC23	8.69955e-42	6.73073e-37
rs17385526	1	43238031	CCDC23	8.69955e-42	6.73073e-37
rs11210721	1	43272246	CCDC23	8.69955e-42	6.73073e-37
rs1108734	1	43278242	CCDC23	8.69955e-42	6.73073e-37
rs33950227	1	43296173	CCDC23	8.69955e-42	6.73073e-37
rs6565724	17	270933	C17orf97	4.81076e-41	3.61863e-36
rs3182911	17	17168164	COPS3	5.41425e-41	4.03521e-36
rs7957464	12	10104289	CLEC12A	9.28415e-41	6.79476e-36
rs1029830	17	17184097	COPS3	1.33808e-40	9.70552e-36
rs10279821	7	128683547	IRF5	1.9387e-40	1.36951e-35
rs8065832	17	17122327	COPS3	6.34989e-40	4.37158e-35
rs12481228	20	34218673	CPNE1	2.69356e-39	1.69032e-34
rs6058303	20	34290281	CPNE1	2.69356e-39	1.69032e-34
rs11696947	20	34312658	CPNE1	2.69356e-39	1.69032e-34
rs11699044	20	34312713	CPNE1	2.69356e-39	1.69032e-34
rs1324414	13	33174225	PFAAP5	2.97833e-39	1.84695e-34
rs2301652	17	15928584	ZSWIM7	6.76398e-39	4.13147e-34
rs323720	1	43271033	CCDC23	9.01323e-39	5.42377e-34
rs161827	1	7982034	UTS2	1.58179e-38	9.24461e-34
rs161811	1	7999602	UTS2	1.58179e-38	9.24461e-34
rs2280714	7	128594725	IRF5	1.79794e-38	1.04328e-33
rs10774671	12	113357193	OAS1	1.81412e-38	1.04521e-33
rs7806458	7	150476888	TMEM176A	1.89145e-38	1.08208e-33
rs1872241	6	41195903	TREML3	2.27332e-38	1.26492e-33
rs9369265	6	41196605	TREML3	2.27332e-38	1.26492e-33
rs2101269	6	41196727	TREML3	2.27332e-38	1.26492e-33
rs7769759	6	41197857	TREML3	2.27332e-38	1.26492e-33
rs17103120	14	35703839	PPP2R3C	2.82757e-38	1.56261e-33
rs12578560	12	10160527	CLEC12A	3.86564e-38	2.10761e-33
rs2998285	10	28793239	WAC	4.74231e-38	2.56835e-33
rs28092	5	102149795	PAM	5.5165e-38	2.96784e-33
rs3177979	12	113357209	OAS1	7.52447e-38	3.96926e-33
rs2660	12	113357442	OAS1	7.52447e-38	3.96926e-33
rs4767030	12	113359577	OAS1	7.52447e-38	3.96926e-33
rs693235	11	64492762	SF1	1.05496e-37	5.13187e-33
rs2267918	11	64495284	SF1	1.05496e-37	5.13187e-33
rs10897524	11	64503363	SF1	1.05496e-37	5.13187e-33
rs477549	11	64527080	SF1	1.05496e-37	5.13187e-33
rs637332	11	64528750	SF1	1.05496e-37	5.13187e-33
rs523200	11	64532579	SF1	1.05496e-37	5.13187e-33
rs474707	11	64544135	SF1	1.05496e-37	5.13187e-33
rs3741398	11	64546106	SF1	1.05496e-37	5.13187e-33
rs483962	11	64527751	SF1	1.06494e-37	5.14956e-33
rs9349180	6	41185474	TREML3	1.35774e-37	6.48819e-33
rs720201	2	61376463	LOC339804	2.72531e-37	1.27975e-32
rs2522420	4	108609628	PAPSS1	3.92119e-37	1.83072e-32
rs6565724	17	270933	C17orf97	4.94635e-37	2.27021e-32
rs258247	5	102160785	PAM	8.11582e-37	3.64257e-32
rs12310416	12	7912675	CLEC4C	1.12878e-36	4.87758e-32
rs1968871	6	41185430	TREML3	1.32102e-36	5.67809e-32
rs2551928	2	208465778	FAM119A	1.37206e-36	5.716e-32
rs1045780	2	208467150	FAM119A	1.37206e-36	5.716e-32
rs2256941	2	208469184	FAM119A	1.37206e-36	5.716e-32
rs2551949	2	208477852	FAM119A	1.37206e-36	5.716e-32
rs2297256	21	40558421	BRWD1	1.44275e-36	5.97986e-32
rs2014604	17	16176883	ZSWIM7	1.48776e-36	6.07345e-32
rs4791665	17	16196056	ZSWIM7	1.48776e-36	6.07345e-32
rs3785623	17	16201160	ZSWIM7	1.48776e-36	6.07345e-32
rs17113838	14	35704667	PPP2R3C	1.81045e-36	7.31718e-32
rs10236569	7	128597587	IRF5	2.47871e-36	9.72767e-32
rs499966	13	32998610	PFAAP5	3.03845e-36	1.16432e-31
rs28092	5	102149795	Hs.482960	4.18145e-36	1.54404e-31
rs7957464	12	10104289	CLEC12A	4.56999e-36	1.66481e-31
rs11032695	11	34447586	CAT	7.35438e-36	2.65533e-31
rs3770809	2	36780952	FEZ2	1.10912e-35	3.98681e-31
rs258247	5	102160785	Hs.482960	1.32816e-35	4.75311e-31
rs161827	1	7982034	UTS2	1.41817e-35	4.94456e-31
rs161811	1	7999602	UTS2	1.41817e-35	4.94456e-31
rs2836934	21	40564885	BRWD1	1.62606e-35	5.55028e-31
rs8130320	21	40580258	BRWD1	1.62606e-35	5.55028e-31
rs8043	7	128607384	IRF5	2.3816e-35	7.96191e-31
rs1890470	20	34357008	CPNE1	2.91136e-35	9.6535e-31
rs9335780	10	28820791	WAC	3.18004e-35	1.0375e-30
rs10877041	12	58328500	XRCC6BP1	3.67634e-35	1.18318e-30
rs2372309	12	58329820	XRCC6BP1	3.67634e-35	1.18318e-30
rs13406184	2	36791226	FEZ2	3.68484e-35	1.18318e-30
rs3171465	21	40552307	BRWD1	4.12501e-35	1.31931e-30
rs2425149	20	34359587	CPNE1	4.56546e-35	1.45445e-30
rs10279821	7	128683547	IRF5	6.36982e-35	2.01349e-30
rs1048434	7	42949038	C7orf25	6.42388e-35	2.01489e-30
rs1048423	7	42949101	C7orf25	6.42388e-35	2.01489e-30
rs12807961	11	34456108	CAT	8.95394e-35	2.68982e-30
rs12808450	11	34456149	CAT	8.95394e-35	2.68982e-30
rs10836234	11	34457654	CAT	8.95394e-35	2.68982e-30
rs11604331	11	34460769	CAT	8.95394e-35	2.68982e-30
rs12440965	15	76958591	SCAPER	8.973e-35	2.68982e-30
rs920712	15	77033934	SCAPER	8.973e-35	2.68982e-30
rs11852395	15	77087785	SCAPER	8.973e-35	2.68982e-30
rs4312276	15	77164361	SCAPER	8.973e-35	2.68982e-30
rs10851892	15	77176491	SCAPER	8.973e-35	2.68982e-30
rs2395943	6	42940673	PEX6	1.76192e-34	5.11101e-30
rs2295281	1	12059412	MFN2	1.7679e-34	5.11101e-30
rs4984871	16	446187	NME4	1.85826e-34	5.31547e-30
rs4984666	16	446362	NME4	1.85826e-34	5.31547e-30
rs11498	2	61370819	LOC339804	1.92106e-34	5.47585e-30
rs11072610	15	76930805	SCAPER	2.09579e-34	5.89121e-30
rs9381042	6	41171213	TREML4	3.1466e-34	8.6651e-30
rs11072626	15	77090826	SCAPER	3.9076e-34	1.06883e-29
rs3812908	15	77176158	SCAPER	3.9076e-34	1.06883e-29
rs10069361	5	96284803	ERAP2	4.25367e-34	1.15958e-29
rs12406279	1	43310639	ERMAP	4.88469e-34	1.31833e-29
rs752637	7	128579420	IRF5	5.81806e-34	1.55988e-29
rs7806458	7	150476888	TMEM176B	6.51685e-34	1.74148e-29
rs686043	5	102163325	PAM	8.28747e-34	2.20016e-29
rs3822262	4	6697766	S100P	1.10208e-33	2.9068e-29
rs3757385	7	128577304	IRF5	1.21337e-33	3.18999e-29
rs2072535	2	36817152	FEZ2	1.25638e-33	3.28182e-29
rs6488608	12	7882602	CLEC4C	1.57109e-33	4.09074e-29
rs2709373	2	208386024	FAM119A	1.64127e-33	4.2598e-29
rs2072449	12	8210637	C3AR1	1.65556e-33	4.28321e-29
rs12068202	1	7961294	UTS2	1.86336e-33	4.77521e-29
rs161810	1	8000797	UTS2	1.86336e-33	4.77521e-29
rs519546	1	8001466	UTS2	1.86336e-33	4.77521e-29
rs161803	1	7975789	UTS2	2.13185e-33	5.44607e-29
rs12335	9	136197834	SURF6	2.30088e-33	5.85945e-29
rs17645885	5	73850292	ENC1	2.67767e-33	6.79769e-29
rs7951555	11	44091399	PHACS	2.72757e-33	6.88135e-29
rs2074040	11	44093323	PHACS	2.72757e-33	6.88135e-29
rs4918748	10	114158908	ACSL5	3.13525e-33	7.78009e-29
rs11195949	10	114164146	ACSL5	3.13525e-33	7.78009e-29
rs12804689	11	34431488	CAT	3.14126e-33	7.78009e-29
rs873466	11	34436686	CAT	3.14126e-33	7.78009e-29
rs10885343	10	114159452	ACSL5	3.3263e-33	8.21333e-29
rs7313235	12	10132283	CLEC12B	5.01684e-33	1.22388e-28
rs2167273	7	128689413	IRF5	5.2524e-33	1.27752e-28
rs2253676	6	41181489	TREML4	5.62302e-33	1.35952e-28
rs2803496	6	41196156	TREML4	5.62302e-33	1.35952e-28
rs7271036	20	34467215	CPNE1	7.32363e-33	1.71479e-28
rs6060676	20	34498551	CPNE1	7.32363e-33	1.71479e-28
rs6060677	20	34499368	CPNE1	7.32363e-33	1.71479e-28
rs17129748	10	114142399	ACSL5	7.40033e-33	1.72753e-28
rs12753665	1	183546061	SMG7	7.80376e-33	1.81649e-28
rs9649520	7	128672645	IRF5	8.34688e-33	1.93736e-28
rs17431878	20	34502107	CPNE1	8.44278e-33	1.95404e-28
rs7806458	7	150476888	ABP1	8.75281e-33	2.02004e-28
rs13407913	2	25097644	ADCY3	9.19271e-33	2.10958e-28
rs1982756	6	41205770	TREML4	1.09602e-32	2.50809e-28
rs3765115	15	76673716	SCAPER	1.1735e-32	2.67037e-28
rs4886493	15	76679026	SCAPER	1.1735e-32	2.67037e-28
rs10483877	14	77182302	VASH1	1.48053e-32	3.33168e-28
rs2739338	22	24297130	DDT	1.67775e-32	3.76508e-28
rs10846411	12	8206167	C3AR1	2.46137e-32	5.44928e-28
rs11057065	12	8208244	C3AR1	2.46137e-32	5.44928e-28
rs10774679	12	113374748	OAS1	2.4685e-32	5.44928e-28
rs12310416	12	7912675	CLEC4C	2.64762e-32	5.82885e-28
rs437131	15	76781051	SCAPER	4.0074e-32	8.61241e-28
rs4766497	12	110950376	GPN3	4.04687e-32	8.67431e-28
rs11691600	2	36810133	FEZ2	5.22978e-32	1.11288e-27
rs9127	5	96372165	ERAP2	5.23306e-32	1.11288e-27
rs10735079	12	113380008	OAS1	6.39776e-32	1.34299e-27
rs2454450	15	76831236	SCAPER	8.91473e-32	1.85219e-27
rs2726207	4	108639491	PAPSS1	9.5869e-32	1.97168e-27
rs9424303	1	3736319	KIAA0562	1.00346e-31	2.04306e-27
rs6424058	1	3747580	KIAA0562	1.00346e-31	2.04306e-27
rs2275822	1	3761479	KIAA0562	1.00346e-31	2.04306e-27
rs6488608	12	7882602	CLEC4C	1.04757e-31	2.12754e-27
rs686043	5	102163325	Hs.482960	1.0646e-31	2.15138e-27
rs12935851	17	56600244	RAD51C	1.1051e-31	2.19499e-27
rs35288118	17	56600748	RAD51C	1.1051e-31	2.19499e-27
rs17822735	17	56620167	RAD51C	1.1051e-31	2.19499e-27
rs16943176	17	56769887	RAD51C	1.1051e-31	2.19499e-27
rs17222691	17	56771096	RAD51C	1.1051e-31	2.19499e-27
rs17822908	17	56801778	RAD51C	1.1051e-31	2.19499e-27
rs12952325	17	56899371	RAD51C	1.1051e-31	2.19499e-27
rs9303399	17	56672309	RAD51C	1.15974e-31	2.2812e-27
rs1274517	19	50868754	NAPSB	1.23166e-31	2.4052e-27
rs1274514	19	50871147	NAPSB	1.23166e-31	2.4052e-27
rs1405655	19	50882619	NAPSB	1.23166e-31	2.4052e-27
rs9595946	13	33203135	PFAAP5	1.58646e-31	3.08669e-27
rs2240327	3	50113034	RBM6	1.70205e-31	3.28431e-27
rs10049087	3	50123417	RBM6	1.70205e-31	3.28431e-27
rs16943326	17	57050365	RAD51C	1.80376e-31	3.46412e-27
rs6545790	2	25109302	ADCY3	2.38274e-31	4.46801e-27
rs3809724	17	57061238	RAD51C	2.38699e-31	4.46801e-27
rs2240326	3	50128386	RBM6	2.74067e-31	5.07161e-27
rs2013208	3	50129399	RBM6	2.74067e-31	5.07161e-27
rs1708618	17	17131869	COPS3	2.92112e-31	5.39326e-27
rs161803	1	7975789	UTS2	4.75043e-31	8.65272e-27
rs12068202	1	7961294	UTS2	5.07695e-31	9.18567e-27
rs161810	1	8000797	UTS2	5.07695e-31	9.18567e-27
rs519546	1	8001466	UTS2	5.07695e-31	9.18567e-27
rs10401135	19	9443332	ZNF266	5.55715e-31	9.96571e-27
rs3826783	19	9492141	ZNF266	5.55715e-31	9.96571e-27
rs6512110	19	9522724	ZNF266	5.55715e-31	9.96571e-27
rs11880207	19	9531693	ZNF266	5.55715e-31	9.96571e-27
rs4792728	17	16186815	ZSWIM7	6.32264e-31	1.12639e-26
rs10838698	11	47385923	SPI1	7.04241e-31	1.24642e-26
rs2109262	17	16184629	ZSWIM7	1.07743e-30	1.87425e-26
rs11868284	17	16196275	ZSWIM7	1.60275e-30	2.72391e-26
rs6752483	2	25120086	ADCY3	1.64528e-30	2.79035e-26
rs13311400	7	26954746	SKAP2	1.74184e-30	2.94796e-26
rs595541	7	42927961	C7orf25	2.0692e-30	3.48747e-26
rs10870177	9	139987350	UAP1L1	2.39015e-30	4.01175e-26
rs10411141	19	9536203	ZNF266	2.66064e-30	4.44738e-26
rs4766500	12	110993791	GPN3	2.76905e-30	4.60962e-26
rs532747	11	64519062	SF1	2.81414e-30	4.67511e-26
rs569602	11	64514506	SF1	3.29906e-30	5.44727e-26
rs3803752	17	56540267	RAD51C	3.3212e-30	5.46163e-26
rs2007993	17	56590643	RAD51C	3.3212e-30	5.46163e-26
rs2168029	12	69734641	LYZ	3.61406e-30	5.87191e-26
rs4700810	5	178991794	RUFY1	4.59048e-30	7.3845e-26
rs8045689	16	28988269	SPNS1	5.61621e-30	8.94597e-26
rs2464975	2	208497965	FAM119A	5.95525e-30	9.44898e-26
rs7500321	16	28977020	SPNS1	6.88127e-30	1.08546e-25
rs8106959	19	36219525	TMEM149	7.90693e-30	1.24243e-25
rs7153550	14	35501800	PPP2R3C	8.55601e-30	1.34182e-25
rs11167280	20	34560526	CPNE1	1.08489e-29	1.68419e-25
rs4700810	5	178991794	RUFY1	1.08634e-29	1.68419e-25
rs14291	2	36810586	FEZ2	1.13446e-29	1.75543e-25
rs2189336	17	5326162	RABEP1	1.24532e-29	1.91241e-25
rs34058624	17	57118121	RAD51C	1.55281e-29	2.37116e-25
rs2333409	17	57139134	RAD51C	1.55281e-29	2.37116e-25
rs34678056	17	57177549	RAD51C	1.55281e-29	2.37116e-25
rs1502337	12	111062852	GPN3	1.72615e-29	2.62599e-25
rs4752993	11	47410951	SPI1	2.0376e-29	3.03166e-25
rs34677	5	33998768	AMACR	2.35329e-29	3.48223e-25
rs9960	1	43317793	ERMAP	2.42035e-29	3.56846e-25
rs4802703	19	50884885	NAPSB	2.50769e-29	3.67058e-25
rs1047881	1	213031158	LQK1	2.83557e-29	4.14305e-25
rs12537581	7	43032827	C7orf25	3.20047e-29	4.66781e-25
rs3124752	9	136264493	SURF6	3.70492e-29	5.3842e-25
rs8104483	19	45372354	PVRL2	3.89665e-29	5.65272e-25
rs11713193	3	49924424	RBM6	4.49004e-29	6.45589e-25
rs1062633	3	49924940	RBM6	4.49004e-29	6.45589e-25
rs2230590	3	49936102	RBM6	4.49004e-29	6.45589e-25
rs2008877	3	50162291	RBM6	5.73659e-29	8.16154e-25
rs10172196	2	36780549	FEZ2	6.75047e-29	9.57049e-25
rs17103240	14	35831836	PPP2R3C	7.49538e-29	1.05347e-24
rs4752999	11	47428565	SPI1	7.60794e-29	1.06471e-24
rs755553	11	47432303	SPI1	7.60794e-29	1.06471e-24
rs1484990	15	77055335	SCAPER	8.04215e-29	1.12254e-24
rs3124782	9	136270996	SURF6	9.56476e-29	1.3305e-24
rs8112960	19	21775371	ZNF429	1.23743e-28	1.70299e-24
rs10404721	19	9541833	ZNF266	1.33073e-28	1.82609e-24
rs3755196	2	36773071	FEZ2	1.57441e-28	2.14958e-24
rs9591191	13	33207534	PFAAP5	1.58386e-28	2.15887e-24
rs560807	11	34468639	CAT	1.58699e-28	2.15951e-24
rs10418104	19	9455390	ZNF266	1.60963e-28	2.17211e-24
rs7253373	19	9456230	ZNF266	1.60963e-28	2.17211e-24
rs2217652	19	9490814	ZNF266	1.60963e-28	2.17211e-24
rs10515	19	9523724	ZNF266	1.60963e-28	2.17211e-24
rs2241356	19	9524185	ZNF266	1.60963e-28	2.17211e-24
rs461605	5	102120269	PAM	1.63243e-28	2.19806e-24
rs1531133	2	46843631	CRIPT	1.63624e-28	2.19806e-24
rs494024	11	34464748	CAT	1.70846e-28	2.26781e-24
rs524167	11	34467538	CAT	1.70846e-28	2.26781e-24
rs511895	11	34487729	CAT	1.70846e-28	2.26781e-24
rs499406	11	34491941	CAT	1.70846e-28	2.26781e-24
rs475043	11	34493801	CAT	1.70846e-28	2.26781e-24
rs8413	9	139323311	INPP5E	1.92342e-28	2.54899e-24
rs3757385	7	128577304	IRF5	2.03037e-28	2.68634e-24
rs1143937	11	64569000	SF1	2.42416e-28	3.1866e-24
rs11687089	2	25082926	ADCY3	3.47399e-28	4.54455e-24
rs752637	7	128579420	IRF5	3.70358e-28	4.82934e-24
rs326124	5	7877178	MTRR	3.74652e-28	4.87751e-24
rs3763236	6	42902508	PEX6	3.89191e-28	5.05868e-24
rs7324744	13	115008038	CDC16	4.04237e-28	5.23749e-24
rs9590409	13	115040497	CDC16	4.04237e-28	5.23749e-24
rs12578560	12	10160527	CLEC12B	4.4211e-28	5.70997e-24
rs7524203	1	213011812	LQK1	4.56459e-28	5.88593e-24
rs11691767	2	36810473	FEZ2	4.63487e-28	5.9671e-24
rs7426	17	5288983	RABEP1	5.13643e-28	6.59192e-24
rs4880201	9	139995065	UAP1L1	5.36775e-28	6.87793e-24
rs13387729	2	25076126	ADCY3	5.50171e-28	7.01637e-24
rs2280406	3	49941436	RBM6	5.58141e-28	7.10687e-24
rs10972067	9	34342634	NUDT2	5.80309e-28	7.37756e-24
rs3212	3	49145741	WDR6	6.24624e-28	7.90384e-24
rs4279134	3	49156676	WDR6	6.24624e-28	7.90384e-24
rs6779394	3	49157771	WDR6	6.24624e-28	7.90384e-24
rs1806261	17	5317008	RABEP1	6.41575e-28	8.10571e-24
rs2681781	3	49898273	RBM6	1.1941e-27	1.4901e-23
rs11130176	3	48844077	WDR6	1.21355e-27	1.49825e-23
rs10780033	3	48891275	WDR6	1.21355e-27	1.49825e-23
rs9840684	3	48893780	WDR6	1.21355e-27	1.49825e-23
rs4974079	3	48906469	WDR6	1.21355e-27	1.49825e-23
rs11924597	3	48937790	WDR6	1.21355e-27	1.49825e-23
rs1134591	3	48972892	WDR6	1.21355e-27	1.49825e-23
rs7621015	3	49016056	WDR6	1.21355e-27	1.49825e-23
rs4759523	12	131315412	STX2	1.70818e-27	2.06808e-23
rs2001483	12	131318645	STX2	1.70818e-27	2.06808e-23
rs1065483	17	5284770	RABEP1	1.91881e-27	2.3059e-23
rs17103242	14	35832837	PPP2R3C	1.96984e-27	2.36373e-23
rs2301393	13	33232435	PFAAP5	1.99674e-27	2.37844e-23
rs7985656	13	33238551	PFAAP5	1.99674e-27	2.37844e-23
rs6781790	3	49044767	WDR6	2.31838e-27	2.74546e-23
rs2167273	7	128689413	IRF5	2.60644e-27	3.07761e-23
rs1129187	6	42932200	PEX6	2.62379e-27	3.0936e-23
rs12946522	17	56768103	RAD51C	2.64913e-27	3.11896e-23
rs7552969	1	3741782	KIAA0562	2.70501e-27	3.18013e-23
rs9840050	3	49133310	WDR6	2.80572e-27	3.28679e-23
rs4974082	3	48999323	WDR6	2.80787e-27	3.28679e-23
rs1384	12	69747834	LYZ	3.04218e-27	3.5356e-23
rs6941212	6	42915920	PEX6	3.14087e-27	3.63987e-23
rs2304130	19	19789528	ATP13A1	3.17209e-27	3.67082e-23
rs2461870	15	76813920	SCAPER	3.29375e-27	3.80078e-23
rs10784774	12	69737879	LYZ	3.33563e-27	3.83277e-23
rs2431531	5	102108099	PAM	3.34554e-27	3.83873e-23
rs2966952	5	7868030	MTRR	3.97658e-27	4.54994e-23
rs10870180	9	140006491	UAP1L1	4.44101e-27	5.0458e-23
rs2231828	11	34502345	CAT	6.15718e-27	6.88969e-23
rs744336	15	76674624	SCAPER	6.3147e-27	7.03687e-23
rs10871516	17	245185	C17orf97	6.61672e-27	7.35326e-23
rs10972067	9	34342634	NUDT2	6.79673e-27	7.54299e-23
rs6512047	19	9437812	ZNF266	7.1249e-27	7.86421e-23
rs10411146	19	9438867	ZNF266	7.1249e-27	7.86421e-23
rs12481545	20	34407698	CPNE1	7.31988e-27	8.05753e-23
rs6060625	20	34414318	CPNE1	7.31988e-27	8.05753e-23
rs367035	11	2923826	SLC22A18	7.61804e-27	8.37439e-23
rs1063964	7	87835469	SRI	7.63144e-27	8.37779e-23
rs2836961	21	40627020	BRWD1	7.89825e-27	8.64732e-23
rs16892218	5	34042757	AMACR	7.99275e-27	8.739e-23
rs1865040	19	9457246	ZNF266	9.97247e-27	1.07648e-22
rs7281463	21	40520783	BRWD1	9.97804e-27	1.07648e-22
rs12459634	19	36230174	U2AF1L4	1.25649e-26	1.3484e-22
rs2871921	19	36232420	U2AF1L4	1.25649e-26	1.3484e-22
rs11556218	15	81598269	IL16	1.34302e-26	1.43556e-22
rs1803275	15	81598416	IL16	1.34302e-26	1.43556e-22
rs162270	5	7909907	MTRR	1.34658e-26	1.43748e-22
rs2702204	1	183457396	SMG7	1.61982e-26	1.70013e-22
rs162027	5	7861638	MTRR	1.93827e-26	2.01871e-22
rs2278406	19	9473229	ZNF266	2.00878e-26	2.08278e-22
rs2431531	5	102108099	Hs.482960	2.15714e-26	2.22386e-22
rs11621391	14	35834558	PPP2R3C	2.66763e-26	2.72592e-22
rs3087822	2	46852033	CRIPT	2.87639e-26	2.93554e-22
rs6791542	3	48787219	WDR6	3.2865e-26	3.288e-22
rs9303399	17	56672309	RAD51C	3.34531e-26	3.34272e-22
rs1063964	7	87835469	SRI	3.94403e-26	3.89309e-22
rs12935851	17	56600244	RAD51C	4.2362e-26	4.14124e-22
rs35288118	17	56600748	RAD51C	4.2362e-26	4.14124e-22
rs17822735	17	56620167	RAD51C	4.2362e-26	4.14124e-22
rs16943176	17	56769887	RAD51C	4.2362e-26	4.14124e-22
rs17222691	17	56771096	RAD51C	4.2362e-26	4.14124e-22
rs17822908	17	56801778	RAD51C	4.2362e-26	4.14124e-22
rs12952325	17	56899371	RAD51C	4.2362e-26	4.14124e-22
rs3809724	17	57061238	RAD51C	4.67603e-26	4.54387e-22
rs10870194	9	139327034	INPP5E	5.00326e-26	4.83869e-22
rs10781542	9	139327439	INPP5E	5.00326e-26	4.83869e-22
rs2070865	21	40715519	BRWD1	5.03166e-26	4.86037e-22
rs17103120	14	35703839	PPP2R3C	5.29138e-26	5.10518e-22
rs2275675	1	183439483	SMG7	5.35896e-26	5.16425e-22
rs11617448	13	115025398	CDC16	5.72172e-26	5.48779e-22
rs10745023	19	9413896	ZNF266	5.80595e-26	5.56201e-22
rs1543423	20	1451628	NSFL1C	5.97538e-26	5.71085e-22
rs11596526	10	75847804	ADK	6.25505e-26	5.96411e-22
rs1274517	19	50868754	NAPSA	6.50366e-26	6.16498e-22
rs1274514	19	50871147	NAPSA	6.50366e-26	6.16498e-22
rs1405655	19	50882619	NAPSA	6.50366e-26	6.16498e-22
rs12951902	17	260747	C17orf97	6.57149e-26	6.22201e-22
rs10871516	17	245185	C17orf97	6.88162e-26	6.48542e-22
rs16943326	17	57050365	RAD51C	8.1094e-26	7.58968e-22
rs4676744	3	121481801	IQCB1	9.00838e-26	8.34453e-22
rs6808500	3	121509881	IQCB1	9.00838e-26	8.34453e-22
rs2428427	7	27111195	SKAP2	9.50666e-26	8.78604e-22
rs7951555	11	44091399	ACCS	1.05006e-25	9.61711e-22
rs2074040	11	44093323	ACCS	1.05006e-25	9.61711e-22
rs10024529	4	1363886	CRIPAK	1.17746e-25	1.07597e-21
rs11032722	11	34508792	CAT	1.21721e-25	1.10979e-21
rs2291067	19	36273534	TMEM149	1.33472e-25	1.21421e-21
rs1001373	1	171684506	VAMP4	1.37249e-25	1.24578e-21
rs737254	11	34514941	CAT	1.40429e-25	1.27322e-21
rs7960552	12	111164237	GPN3	1.42998e-25	1.29506e-21
rs11210669	1	43024213	CCDC23	1.51821e-25	1.37191e-21
rs7914469	10	75786395	ADK	1.59371e-25	1.43059e-21
rs2240259	17	56458129	RAD51C	1.6589e-25	1.48582e-21
rs4778636	15	81591639	IL16	1.80299e-25	1.60956e-21
rs2234185	6	42897074	PEX6	2.34926e-25	2.07217e-21
rs2549778	5	96204254	ERAP2	2.49083e-25	2.19467e-21
rs4414157	10	75808313	ADK	2.51471e-25	2.21002e-21
rs7324744	13	115008038	CDC16	2.51643e-25	2.21002e-21
rs9590409	13	115040497	CDC16	2.51643e-25	2.21002e-21
rs2236057	1	12062205	MFN2	2.96434e-25	2.58108e-21
rs3952	22	38456598	PICK1	3.03857e-25	2.64288e-21
rs2295716	10	102744214	MRPL43	3.29157e-25	2.82661e-21
rs722435	10	102745062	MRPL43	3.29157e-25	2.82661e-21
rs2863095	10	102746503	MRPL43	3.29157e-25	2.82661e-21
rs5841	16	450309	NME4	3.31909e-25	2.84478e-21
rs17649050	1	171713808	VAMP4	3.32323e-25	2.84478e-21
rs10913582	1	171715585	VAMP4	3.32323e-25	2.84478e-21
rs15739	17	16229232	ZSWIM7	3.48612e-25	2.98108e-21
rs12945877	17	16238203	ZSWIM7	3.49915e-25	2.98907e-21
rs660614	11	68659488	MRPL21	3.67499e-25	3.12941e-21
rs629426	11	68671104	MRPL21	3.67499e-25	3.12941e-21
rs12946522	17	56768103	RAD51C	4.77435e-25	4.03175e-21
rs6517522	21	40553845	HMGN1	5.61624e-25	4.70358e-21
rs3741981	12	113348870	OAS1	6.89552e-25	5.72773e-21
rs1680032	4	1243573	CRIPAK	7.54919e-25	6.22614e-21
rs1732115	4	1244416	CRIPAK	7.54919e-25	6.22614e-21
rs1061474	3	50144951	RBM6	8.09579e-25	6.64994e-21
rs7704785	5	57790337	GAPT	9.07905e-25	7.43504e-21
rs1389308	5	57791311	GAPT	9.07905e-25	7.43504e-21
rs12915184	15	76965922	SCAPER	9.69053e-25	7.89599e-21
rs9661596	1	171652664	VAMP4	1.01913e-24	8.28736e-21
rs11799420	1	171652978	VAMP4	1.01913e-24	8.28736e-21
rs4942892	13	33328407	PFAAP5	1.04802e-24	8.49963e-21
rs1924606	13	33333368	PFAAP5	1.04802e-24	8.49963e-21
rs1138536	3	50153356	RBM6	1.04837e-24	8.49963e-21
rs11190786	10	102757442	MRPL43	1.06409e-24	8.61848e-21
rs3803752	17	56540267	RAD51C	1.0921e-24	8.82776e-21
rs2007993	17	56590643	RAD51C	1.0921e-24	8.82776e-21
rs4919510	10	102734778	MRPL43	1.11018e-24	8.96501e-21
rs2285932	12	113386950	OAS1	1.19125e-24	9.60053e-21
rs10744791	12	113410316	OAS1	1.19125e-24	9.60053e-21
rs10781499	9	139266405	CARD9	1.28592e-24	1.0343e-20
rs636049	11	68667198	MRPL21	1.29613e-24	1.03947e-20
rs3817604	4	1291337	CRIPAK	1.29619e-24	1.03947e-20
rs28429103	4	1320023	CRIPAK	1.29619e-24	1.03947e-20
rs7324744	13	115008038	CDC16	1.38183e-24	1.09732e-20
rs9590409	13	115040497	CDC16	1.38183e-24	1.09732e-20
rs9596233	13	33351016	PFAAP5	1.44219e-24	1.1419e-20
rs619727	11	68627535	MRPL21	1.47697e-24	1.16717e-20
rs604524	11	68629929	MRPL21	1.47697e-24	1.16717e-20
rs739768	17	5290703	RABEP1	1.48058e-24	1.16774e-20
rs1806239	17	5295528	RABEP1	1.48058e-24	1.16774e-20
rs1056295	10	102715183	MRPL43	1.48401e-24	1.16932e-20
rs12493578	3	48730116	WDR6	1.522e-24	1.19693e-20
rs461605	5	102120269	Hs.482960	1.53739e-24	1.20787e-20
rs4886800	15	76678692	SCAPER	1.7755e-24	1.375e-20
rs3807306	7	128580680	IRF5	1.77551e-24	1.375e-20
rs2298914	1	171710405	VAMP4	1.80508e-24	1.39656e-20
rs11617448	13	115025398	CDC16	1.89235e-24	1.46269e-20
rs17103120	14	35703839	KIAA0391	1.93649e-24	1.49255e-20
rs4955418	3	49200627	WDR6	2.02827e-24	1.56033e-20
rs9303401	17	56847945	RAD51C	2.06335e-24	1.57984e-20
rs6662720	1	171654616	VAMP4	2.2911e-24	1.74763e-20
rs10189685	2	203488449	FAM117B	2.3284e-24	1.77441e-20
rs6662844	1	183494453	SMG7	2.73296e-24	2.06913e-20
rs789172	1	183509238	SMG7	2.73296e-24	2.06913e-20
rs11811630	1	183533910	SMG7	2.73296e-24	2.06913e-20
rs2026267	21	40711477	HMGN1	2.85032e-24	2.15598e-20
rs1058381	17	5288018	RABEP1	2.97121e-24	2.24324e-20
rs1058398	17	5288760	RABEP1	2.97121e-24	2.24324e-20
rs12631989	3	49273996	WDR6	3.03685e-24	2.2743e-20
rs6058296	20	34269225	CPNE1	3.03754e-24	2.2743e-20
rs2050729	20	34294409	CPNE1	3.03754e-24	2.2743e-20
rs2425090	20	34304783	CPNE1	3.03754e-24	2.2743e-20
rs2756071	6	2952289	SERPINB6	3.16098e-24	2.35803e-20
rs6433294	2	172369069	CYBRD1	3.18088e-24	2.37069e-20
rs2425094	20	34306974	CPNE1	3.1838e-24	2.37069e-20
rs11715581	3	49194331	WDR6	3.34651e-24	2.47822e-20
rs12490393	3	49196132	WDR6	3.34651e-24	2.47822e-20
rs12637576	3	49237334	WDR6	3.34651e-24	2.47822e-20
rs12629759	3	49237394	WDR6	3.34651e-24	2.47822e-20
rs34058624	17	57118121	RAD51C	3.42312e-24	2.52804e-20
rs2333409	17	57139134	RAD51C	3.42312e-24	2.52804e-20
rs34678056	17	57177549	RAD51C	3.42312e-24	2.52804e-20
rs2266886	23	153231352	TMEM187	3.90557e-24	2.87649e-20
rs2274064	1	183542387	SMG7	4.07927e-24	2.99357e-20
rs10781510	9	139279173	CARD9	4.82913e-24	3.52475e-20
rs1674034	19	7675877	LOC100131801	4.92908e-24	3.59447e-20
rs10972047	9	34310357	NUDT2	5.19565e-24	3.78547e-20
rs6960994	7	128692657	IRF5	5.25284e-24	3.82371e-20
rs7212681	17	5191527	RABEP1	5.30124e-24	3.85548e-20
rs6074718	20	1485913	NSFL1C	5.40515e-24	3.92403e-20
rs11676272	2	25141538	ADCY3	5.54732e-24	4.02364e-20
rs4902352	14	65422796	CHURC1	6.15335e-24	4.44338e-20
rs6460260	7	65215455	VKORC1L1	6.18991e-24	4.44607e-20
rs4718273	7	65216099	VKORC1L1	6.18991e-24	4.44607e-20
rs13236109	7	65350058	VKORC1L1	6.18991e-24	4.44607e-20
rs35391607	7	65360829	VKORC1L1	6.18991e-24	4.44607e-20
rs6949812	7	65387101	VKORC1L1	6.18991e-24	4.44607e-20
rs1039664	7	65449716	VKORC1L1	6.18991e-24	4.44607e-20
rs734008	14	35816921	PPP2R3C	6.43639e-24	4.61495e-20
rs2735306	21	40713134	HMGN1	6.47296e-24	4.63708e-20
rs3207090	1	213068595	LQK1	7.08408e-24	5.05259e-20
rs3812570	9	139275204	CARD9	7.36915e-24	5.2421e-20
rs10753766	1	168166616	TIPRL	7.37701e-24	5.24311e-20
rs11617448	13	115025398	CDC16	7.51614e-24	5.31872e-20
rs2372379	12	58378795	XRCC6BP1	7.59837e-24	5.36756e-20
rs4077515	9	139266496	CARD9	7.74177e-24	5.46261e-20
rs1476413	1	11852300	MTHFR	7.74637e-24	5.46261e-20
rs258244	5	102161751	PAM	8.2222e-24	5.7731e-20
rs7954291	12	58360500	XRCC6BP1	8.89211e-24	6.22532e-20
rs11172400	12	58360970	XRCC6BP1	8.89211e-24	6.22532e-20
rs3848662	19	36216056	U2AF1L4	8.89691e-24	6.22532e-20
rs10972032	9	34269079	NUDT2	9.76187e-24	6.82467e-20
rs7350355	23	153247745	TMEM187	1.0555e-23	7.33498e-20
rs17482440	2	61548857	LOC339804	1.10427e-23	7.65426e-20
rs6033901	20	1472779	NSFL1C	1.27614e-23	8.83805e-20
rs10781500	9	139269338	CARD9	1.3238e-23	9.1525e-20
rs10781507	9	139272058	CARD9	1.3238e-23	9.1525e-20
rs7495961	15	65031441	RBPMS2	1.34898e-23	9.31194e-20
rs730830	4	1240091	CRIPAK	1.36287e-23	9.39861e-20
rs1293764	12	113425679	OAS1	1.57548e-23	1.08098e-19
rs6079330	20	1468516	NSFL1C	1.58364e-23	1.08566e-19
rs2961102	7	65424658	VKORC1L1	1.59543e-23	1.09282e-19
rs1265923	4	1209174	CRIPAK	1.62041e-23	1.10899e-19
rs2469249	15	76772062	SCAPER	1.66445e-23	1.13626e-19
rs3812560	9	139269905	CARD9	1.71755e-23	1.17153e-19
rs1384	12	69747834	LYZ	1.88708e-23	1.285e-19
rs848622	2	36801999	FEZ2	1.88954e-23	1.2856e-19
rs848518	2	36763205	FEZ2	1.91717e-23	1.30331e-19
rs1806267	17	5322106	RABEP1	2.33519e-23	1.58087e-19
rs6438726	3	122110921	CCDC58	2.38521e-23	1.61204e-19
rs6581889	12	69757429	LYZ	2.45266e-23	1.65625e-19
rs10057028	5	57795822	GAPT	2.50603e-23	1.68949e-19
rs299615	5	34042097	AMACR	2.51755e-23	1.69584e-19
rs1002286	22	24257337	GSTT1	2.59026e-23	1.74193e-19
rs4122189	6	31167927	PSORS1C3	2.59462e-23	1.74342e-19
rs4266763	9	139289825	CARD9	2.79486e-23	1.87642e-19
rs7309141	12	110587637	GPN3	2.89194e-23	1.93839e-19
rs1786702	11	126139100	FOXRED1	3.08005e-23	2.06108e-19
rs1748343	10	26974263	PDSS1	3.11249e-23	2.07935e-19
rs4378078	9	139375962	INPP5E	3.19307e-23	2.12968e-19
rs6584356	10	102050242	PKD2L1	3.39215e-23	2.26061e-19
rs7581601	2	203497786	FAM117B	3.65438e-23	2.41752e-19
rs10784774	12	69737879	LYZ	3.67782e-23	2.43105e-19
rs10177225	2	61594498	LOC339804	3.71913e-23	2.45636e-19
rs4624474	21	40686327	BRWD1	3.77608e-23	2.49194e-19
rs4802703	19	50884885	NAPSA	3.88488e-23	2.56166e-19
rs10070522	5	57786110	GAPT	3.89339e-23	2.56519e-19
rs2240775	17	74710128	JMJD6	3.95983e-23	2.59633e-19
rs2240774	17	74710572	JMJD6	3.95983e-23	2.59633e-19
rs2286585	17	74712310	JMJD6	3.95983e-23	2.59633e-19
rs9404983	6	31166828	PSORS1C3	3.98762e-23	2.61244e-19
rs1181874	1	3682070	KIAA0562	4.14331e-23	2.71225e-19
rs4266763	9	139289825	INPP5E	4.47128e-23	2.92224e-19
rs13178332	5	57830080	GAPT	4.50566e-23	2.94234e-19
rs11857713	15	81591265	IL16	4.68594e-23	3.05516e-19
rs2236313	6	167360389	RNASET2	4.71173e-23	3.06951e-19
rs647618	7	42972411	C7orf25	4.85816e-23	3.16236e-19
rs8007089	14	23391913	PRMT5	5.27071e-23	3.41722e-19
rs1317944	1	160263124	NCSTN	5.30044e-23	3.43102e-19
rs10752637	1	160312265	NCSTN	5.34039e-23	3.45138e-19
rs622082	11	68703959	MRPL21	5.38829e-23	3.4768e-19
rs546382	11	68704264	MRPL21	5.38829e-23	3.4768e-19
rs2186366	22	24254113	DDT	5.67542e-23	3.65916e-19
rs848596	2	36803863	FEZ2	5.92438e-23	3.80458e-19
rs17102970	14	35480569	PPP2R3C	6.39632e-23	4.10118e-19
rs12713435	2	61499789	LOC339804	6.6617e-23	4.2646e-19
rs2076004	1	11886813	MTHFR	7.02422e-23	4.48959e-19
rs777584	2	61410346	LOC339804	7.03749e-23	4.49454e-19
rs3794207	12	121686078	CAMKK2	7.55149e-23	4.80769e-19
rs1543423	20	1451628	NSFL1C	8.67944e-23	5.49994e-19
rs4630335	12	58302258	XRCC6BP1	9.29898e-23	5.88793e-19
rs4908393	1	28550448	ATPIF1	9.44744e-23	5.97728e-19
rs10781500	9	139269338	INPP5E	9.64778e-23	6.09454e-19
rs10781507	9	139272058	INPP5E	9.64778e-23	6.09454e-19
rs7568438	2	203547106	FAM117B	9.77917e-23	6.16795e-19
rs4761154	12	69705362	LYZ	9.85725e-23	6.20755e-19
rs10878964	12	69720691	LYZ	9.85725e-23	6.20755e-19
rs490633	1	28538204	ATPIF1	1.04488e-22	6.54961e-19
rs2330635	22	24251344	DDT	1.18355e-22	7.39598e-19
rs6433294	2	172369069	CYBRD1	1.30438e-22	8.12609e-19
rs2275700	1	160214027	NCSTN	1.32582e-22	8.24701e-19
rs1874328	7	128585104	IRF5	1.51115e-22	9.37826e-19
rs2239464	23	153348431	TMEM187	1.54984e-22	9.59641e-19
rs17113838	14	35704667	PPP2R3C	1.60148e-22	9.89349e-19
rs6662706	1	3732596	KIAA0562	1.60636e-22	9.90859e-19
rs6571303	23	153247954	TMEM187	1.60913e-22	9.91815e-19
rs11634019	15	76634680	SCAPER	1.6257e-22	1.00127e-18
rs17355759	5	102044030	Hs.482960	1.64422e-22	1.01038e-18
rs385827	5	102095375	Hs.482960	1.64422e-22	1.01038e-18
rs1039968	2	203557151	FAM117B	1.75829e-22	1.07965e-18
rs2296971	13	115004914	CDC16	1.7951e-22	1.10059e-18
rs2296970	13	115004935	CDC16	1.7951e-22	1.10059e-18
rs1250116	4	1224587	CRIPAK	1.80703e-22	1.10541e-18
rs884421	4	1227469	CRIPAK	1.80703e-22	1.10541e-18
rs12121543	1	11854671	MTHFR	1.82139e-22	1.11335e-18
rs1065052	11	10555589	MRVI1	1.82426e-22	1.11427e-18
rs2266890	23	153247722	TMEM187	1.97187e-22	1.20352e-18
rs9508	1	28564279	ATPIF1	1.99806e-22	1.21859e-18
rs2884675	1	213002088	NSL1	2.00333e-22	1.22089e-18
rs2266886	23	153231352	CXorf12	2.03048e-22	1.23651e-18
rs10401135	19	9443332	ZNF266	2.04903e-22	1.24222e-18
rs3826783	19	9492141	ZNF266	2.04903e-22	1.24222e-18
rs6512110	19	9522724	ZNF266	2.04903e-22	1.24222e-18
rs11880207	19	9531693	ZNF266	2.04903e-22	1.24222e-18
rs6074718	20	1485913	NSFL1C	2.0905e-22	1.26642e-18
rs10972032	9	34269079	NUDT2	2.21893e-22	1.34221e-18
rs2066470	1	11863057	MTHFR	2.49455e-22	1.50222e-18
rs7553194	1	11864149	MTHFR	2.59428e-22	1.56112e-18
rs2296971	13	115004914	CDC16	2.9893e-22	1.7856e-18
rs2296970	13	115004935	CDC16	2.9893e-22	1.7856e-18
rs627911	11	126072688	FOXRED1	3.08047e-22	1.83871e-18
rs8007089	14	23391913	PRMT5	3.14557e-22	1.87344e-18
rs2097470	22	26904965	TFIP11	3.32346e-22	1.97504e-18
rs2489585	10	26985971	PDSS1	3.33807e-22	1.98227e-18
rs4942925	13	33381244	PFAAP5	3.53971e-22	2.09463e-18
rs12712508	2	36771309	FEZ2	3.54422e-22	2.09463e-18
rs451819	5	102078587	Hs.482960	3.54533e-22	2.09463e-18
rs467186	5	102096919	Hs.482960	3.54533e-22	2.09463e-18
rs1883613	6	133077063	VNN2	3.82028e-22	2.2538e-18
rs15702	1	212911836	NSL1	3.85051e-22	2.2667e-18
rs4951639	1	212975778	NSL1	3.85051e-22	2.2667e-18
rs10864002	1	212997385	NSL1	3.85051e-22	2.2667e-18
rs1267818	7	66107024	VKORC1L1	3.89744e-22	2.28935e-18
rs1267817	7	66110040	VKORC1L1	3.89744e-22	2.28935e-18
rs2659911	7	66158420	VKORC1L1	3.89744e-22	2.28935e-18
rs397605	5	102087116	Hs.482960	3.95429e-22	2.31939e-18
rs12897338	14	100844368	WDR25	3.96588e-22	2.32451e-18
rs3745356	19	7553021	PEX11G	4.19527e-22	2.45365e-18
rs1061511	1	160189500	NCSTN	4.21005e-22	2.46052e-18
rs10411141	19	9536203	ZNF266	4.23435e-22	2.47294e-18
rs17113838	14	35704667	KIAA0391	4.34183e-22	2.53026e-18
rs451819	5	102078587	PAM	4.49107e-22	2.61348e-18
rs467186	5	102096919	PAM	4.49107e-22	2.61348e-18
rs10972047	9	34310357	NUDT2	4.73473e-22	2.74936e-18
rs574198	11	126069841	FOXRED1	4.82054e-22	2.7952e-18
rs6079330	20	1468516	NSFL1C	4.87445e-22	2.82444e-18
rs35735127	7	65300423	VKORC1L1	4.90963e-22	2.84279e-18
rs1805008	16	89986144	CDK10	4.95195e-22	2.86526e-18
rs4822451	22	24248166	DDT	5.29111e-22	3.05715e-18
rs5760102	22	24248761	DDT	5.29111e-22	3.05715e-18
rs35315599	7	66254767	VKORC1L1	5.44869e-22	3.14372e-18
rs13306556	1	11852110	MTHFR	5.58828e-22	3.21968e-18
rs34824368	7	143087432	ZYX	5.61996e-22	3.23564e-18
rs397605	5	102087116	PAM	5.71612e-22	3.28868e-18
rs17355357	16	56400976	BBS2	5.88561e-22	3.37901e-18
rs7270009	20	34433561	CPNE1	5.99735e-22	3.44073e-18
rs2305641	12	69646914	LYZ	6.12927e-22	3.51146e-18
rs17083818	5	93947146	ANKRD32	6.38611e-22	3.65087e-18
rs1537516	1	11847861	MTHFR	6.48986e-22	3.69718e-18
rs2294758	6	133045812	VNN2	6.55552e-22	3.72941e-18
rs17037396	1	11862047	MTHFR	6.55562e-22	3.72941e-18
rs868891	3	49949071	RBM6	6.99256e-22	3.97242e-18
rs11709573	3	49956628	RBM6	6.99256e-22	3.97242e-18
rs2168029	12	69734641	LYZ	7.08037e-22	4.01668e-18
rs844887	20	23106084	CD93	7.22199e-22	4.09416e-18
rs4077515	9	139266496	INPP5E	7.66241e-22	4.33778e-18
rs10402951	19	7555092	PEX11G	7.8757e-22	4.45232e-18
rs2014725	1	17417253	PADI2	8.03694e-22	4.53401e-18
rs2235910	1	17425829	PADI2	8.03694e-22	4.53401e-18
rs9940872	16	56561857	BBS2	8.70118e-22	4.89514e-18
rs11032695	11	34447586	CAT	8.78139e-22	4.93685e-18
rs737428	1	17429185	PADI2	9.15026e-22	5.13712e-18
rs8077052	17	57208921	RAD51C	9.32693e-22	5.22907e-18
rs2178742	7	66197799	VKORC1L1	9.57946e-22	5.35956e-18
rs258244	5	102161751	Hs.482960	9.81012e-22	5.48106e-18
rs10781496	9	139261086	CARD9	9.86526e-22	5.50808e-18
rs2000468	22	24241611	GSTT1	9.8882e-22	5.51709e-18
rs5987708	23	102468481	BEX4	1.00216e-21	5.58768e-18
rs10781499	9	139266405	INPP5E	1.01114e-21	5.63391e-18
rs1557524	1	160246485	NCSTN	1.07331e-21	5.97617e-18
rs27394	5	64965757	SGTB	1.08194e-21	6.02014e-18
rs3770821	2	36762126	FEZ2	1.10944e-21	6.16892e-18
rs6774354	3	49961780	RBM6	1.16699e-21	6.48001e-18
rs17552047	13	53602462	OLFM4	1.17663e-21	6.52464e-18
rs1130719	11	838760	CD151	1.20381e-21	6.66628e-18
rs12807961	11	34456108	CAT	1.22457e-21	6.75362e-18
rs12808450	11	34456149	CAT	1.22457e-21	6.75362e-18
rs10836234	11	34457654	CAT	1.22457e-21	6.75362e-18
rs11604331	11	34460769	CAT	1.22457e-21	6.75362e-18
rs1007888	22	24241101	GSTT1	1.25867e-21	6.93223e-18
rs1136995	3	121661597	GOLGB1	1.30401e-21	7.1771e-18
rs12459634	19	36230174	U2AF1L4	1.47195e-21	8.07954e-18
rs2871921	19	36232420	U2AF1L4	1.47195e-21	8.07954e-18
rs2734647	23	153292180	TMEM187	1.48308e-21	8.13512e-18
rs7135092	12	69658330	LYZ	1.4849e-21	8.13963e-18
rs7300266	12	69654187	LYZ	1.49944e-21	8.20821e-18
rs7308481	12	69659299	LYZ	1.49944e-21	8.20821e-18
rs7957464	12	10104289	CLEC12B	1.55207e-21	8.48493e-18
rs713587	2	25158281	ADCY3	1.69868e-21	9.26767e-18
rs3794207	12	121686078	CAMKK2	1.80739e-21	9.84759e-18
rs1055229	2	208531683	FAM119A	1.90694e-21	1.03552e-17
rs12753524	1	212887790	NSL1	2.02005e-21	1.09475e-17
rs424970	9	71113835	PGM5	2.11133e-21	1.14345e-17
rs2235207	1	168159262	TIPRL	2.21387e-21	1.1966e-17
rs928049	9	71120013	PGM5	2.54619e-21	1.37439e-17
rs7254601	19	36147315	TMEM149	2.77718e-21	1.49808e-17
rs8104483	19	45372354	PVRL2	2.90452e-21	1.56158e-17
rs112314	5	64982321	SGTB	2.976e-21	1.59578e-17
rs11079016	17	39976024	NT5C3L	3.04712e-21	1.63284e-17
rs6960994	7	128692657	IRF5	3.26819e-21	1.74555e-17
rs12890307	14	35452132	PPP2R3C	3.27237e-21	1.74663e-17
rs2303146	19	7547074	PEX11G	3.60242e-21	1.91525e-17
rs12753665	1	183546061	SMG7	3.68317e-21	1.9569e-17
rs10404721	19	9541833	ZNF266	3.74039e-21	1.986e-17
rs11879589	19	45373276	PVRL2	3.83552e-21	2.03253e-17
rs1021156	8	79575804	FAM164A	3.85625e-21	2.04218e-17
rs2657433	5	101999586	Hs.482960	4.03964e-21	2.13512e-17
rs2795070	1	160173901	NCSTN	4.10197e-21	2.16244e-17
rs3808619	8	79577726	FAM164A	4.11827e-21	2.16963e-17
rs160646	7	65556280	VKORC1L1	4.50891e-21	2.36469e-17
rs419603	7	65597341	VKORC1L1	4.50891e-21	2.36469e-17
rs2243480	7	65599196	VKORC1L1	4.50891e-21	2.36469e-17
rs17355759	5	102044030	PAM	4.83579e-21	2.52634e-17
rs385827	5	102095375	PAM	4.83579e-21	2.52634e-17
rs424970	9	71113835	PGM5	5.08671e-21	2.64382e-17
rs1045452	12	6572048	NCAPD2	5.23756e-21	2.71701e-17
rs2534712	12	6572549	NCAPD2	5.23756e-21	2.71701e-17
rs589448	12	69752200	LYZ	5.31076e-21	2.75323e-17
rs10781510	9	139279173	INPP5E	5.62024e-21	2.90255e-17
rs10414250	19	9377716	ZNF266	6.26175e-21	3.21344e-17
rs11635527	15	64675313	RBPMS2	6.40556e-21	3.28102e-17
rs16948046	15	64836710	RBPMS2	6.40556e-21	3.28102e-17
rs7556565	1	44416090	CCDC24	6.96694e-21	3.55288e-17
rs4739134	8	79556148	FAM164A	7.46701e-21	3.78887e-17
rs1966115	8	79556891	FAM164A	7.46701e-21	3.78887e-17
rs277374	1	75200486	CRYZ	7.87915e-21	3.97812e-17
rs277368	1	75230606	CRYZ	7.87915e-21	3.97812e-17
rs1054283	8	79610710	FAM164A	8.02009e-21	4.04677e-17
rs514319	15	64771307	RBPMS2	8.04299e-21	4.0558e-17
rs10035650	5	93936485	ANKRD32	8.77268e-21	4.41007e-17
rs10043779	5	93943818	ANKRD32	8.77268e-21	4.41007e-17
rs12951902	17	260747	C17orf97	9.46649e-21	4.75003e-17
rs928049	9	71120013	PGM5	1.00209e-20	5.02202e-17
rs7390	12	6571699	NCAPD2	1.03018e-20	5.15962e-17
rs995232	13	115020319	CDC16	1.04499e-20	5.23054e-17
rs933489	1	156235120	TMEM79	1.05395e-20	5.27215e-17
rs7300836	12	7895804	CLEC4C	1.09024e-20	5.447e-17
rs6581889	12	69757429	LYZ	1.12069e-20	5.58882e-17
rs12804689	11	34431488	CAT	1.15432e-20	5.74592e-17
rs873466	11	34436686	CAT	1.15432e-20	5.74592e-17
rs459202	5	102107466	Hs.482960	1.17768e-20	5.85861e-17
rs6780306	3	122225454	CCDC58	1.1893e-20	5.91282e-17
rs6503866	17	56619581	TRIM37	1.21267e-20	6.00326e-17
rs12453459	17	56624291	TRIM37	1.21267e-20	6.00326e-17
rs6503870	17	56659018	TRIM37	1.21267e-20	6.00326e-17
rs8071916	17	56660279	TRIM37	1.21267e-20	6.00326e-17
rs9907940	17	56663842	TRIM37	1.21267e-20	6.00326e-17
rs302848	17	56686454	TRIM37	1.21267e-20	6.00326e-17
rs405684	17	56777148	TRIM37	1.21267e-20	6.00326e-17
rs162040	5	7887478	MTRR	1.22934e-20	6.08211e-17
rs7211963	17	74696446	JMJD6	1.28413e-20	6.3416e-17
rs2302189	17	56584205	TRIM37	1.31311e-20	6.4729e-17
rs3744108	17	56585872	TRIM37	1.31311e-20	6.4729e-17
rs11748868	5	81362480	ATG10	1.48884e-20	7.29926e-17
rs9303401	17	56847945	RAD51C	1.51719e-20	7.4293e-17
rs2532501	12	6562753	NCAPD2	1.54105e-20	7.53612e-17
rs7214892	17	57065401	TRIM37	1.54179e-20	7.53612e-17
rs3826353	17	57075299	TRIM37	1.54179e-20	7.53612e-17
rs1026920	8	79632010	FAM164A	1.59107e-20	7.77232e-17
rs459202	5	102107466	PAM	1.63756e-20	7.98985e-17
rs7153550	14	35501800	PPP2R3C	1.65427e-20	8.06166e-17
rs2333410	17	57137129	TRIM37	1.67052e-20	8.12138e-17
rs6416932	17	57148991	TRIM37	1.67052e-20	8.12138e-17
rs7502208	17	57165097	TRIM37	1.67052e-20	8.12138e-17
rs8082544	17	57185807	TRIM37	1.67052e-20	8.12138e-17
rs1130719	11	838760	CD151	1.71614e-20	8.3332e-17
rs1130663	11	837582	CD151	1.73044e-20	8.3876e-17
rs1130698	11	838542	CD151	1.73044e-20	8.3876e-17
rs3059	11	840319	CD151	1.73044e-20	8.3876e-17
rs2025577	1	156314104	TMEM79	1.78458e-20	8.64484e-17
rs1476788	17	74697528	JMJD6	1.82343e-20	8.82253e-17
rs6762	11	838722	CD151	1.83639e-20	8.87995e-17
rs7161	1	44438974	CCDC24	1.91276e-20	9.23274e-17
rs5030779	11	837772	CD151	1.91533e-20	9.23964e-17
rs1009181	6	26158993	HIST1H2BD	2.11043e-20	1.01627e-16
rs2236797	1	11892650	MTHFR	2.12965e-20	1.02492e-16
rs10189685	2	203488449	FAM117B	2.16275e-20	1.03539e-16
rs1622208	1	46498375	IPP	2.25739e-20	1.07746e-16
rs7350355	23	153247745	CXorf12	2.31239e-20	1.10306e-16
rs10418104	19	9455390	ZNF266	2.43925e-20	1.15949e-16
rs7253373	19	9456230	ZNF266	2.43925e-20	1.15949e-16
rs2217652	19	9490814	ZNF266	2.43925e-20	1.15949e-16
rs10515	19	9523724	ZNF266	2.43925e-20	1.15949e-16
rs2241356	19	9524185	ZNF266	2.43925e-20	1.15949e-16
rs923829	12	58174306	FAM119B	2.52324e-20	1.19662e-16
rs1250114	4	1224648	CRIPAK	2.60884e-20	1.23577e-16
rs7522860	1	156275281	TMEM79	2.94275e-20	1.38791e-16
rs844834	20	23086504	CD93	3.10718e-20	1.4633e-16
rs844838	20	23088876	CD93	3.10718e-20	1.4633e-16
rs10934592	3	122135242	CCDC58	3.25863e-20	1.53196e-16
rs17129748	10	114142399	ACSL5	3.41111e-20	1.60178e-16
rs3812560	9	139269905	INPP5E	3.64258e-20	1.70653e-16
rs7938117	11	68598054	MRPL21	3.66303e-20	1.71414e-16
rs1057068	17	56598439	TRIM37	3.67451e-20	1.71852e-16
rs12121532	1	42933906	CCDC23	3.6969e-20	1.72799e-16
rs4448553	1	44411589	CCDC24	3.78839e-20	1.76974e-16
rs8060037	16	56484820	BBS2	4.12151e-20	1.91764e-16
rs1748343	10	26974263	PDSS1	4.12754e-20	1.91934e-16
rs1044573	20	25206654	PYGB	4.18151e-20	1.94333e-16
rs2339524	12	111116655	GPN3	4.20976e-20	1.95534e-16
rs7924806	11	833668	CD151	4.23344e-20	1.96521e-16
rs7568438	2	203547106	FAM117B	4.44314e-20	2.06138e-16
rs11879589	19	45373276	PVRL2	4.59758e-20	2.12939e-16
rs6033901	20	1472779	NSFL1C	4.70631e-20	2.17355e-16
rs4822453	22	24254862	GSTT1	4.74388e-20	2.18965e-16
rs7924806	11	833668	CD151	4.75482e-20	2.19346e-16
rs17164229	4	1078596	CRIPAK	4.84792e-20	2.23387e-16
rs3749213	3	122133830	CCDC58	5.00541e-20	2.30513e-16
rs1895213	5	102044072	PAM	5.19607e-20	2.38752e-16
rs11498	2	61370819	AHSA2	5.23423e-20	2.40369e-16
rs1451153	2	46799852	CRIPT	5.48363e-20	2.51396e-16
rs1451152	2	46800150	CRIPT	5.6407e-20	2.5816e-16
rs9671773	14	35542146	PPP2R3C	5.77221e-20	2.63585e-16
rs10865954	3	49211989	WDR6	5.77947e-20	2.63768e-16
rs11120067	1	213094557	LQK1	6.05156e-20	2.75721e-16
rs7988462	13	33380839	PFAAP5	6.07925e-20	2.76828e-16
rs4918748	10	114158908	ACSL5	6.12279e-20	2.78187e-16
rs11195949	10	114164146	ACSL5	6.12279e-20	2.78187e-16
rs4075289	11	830670	CD151	6.27788e-20	2.85074e-16
rs467362	5	64863688	SGTB	6.33445e-20	2.87321e-16
rs972501	5	65010764	SGTB	6.5351e-20	2.96257e-16
rs10885343	10	114159452	ACSL5	6.69507e-20	3.03171e-16
rs1665272	2	61379286	AHSA2	6.74305e-20	3.04098e-16
rs6926737	6	32375745	LOC642073	6.74549e-20	3.04098e-16
rs9268503	6	32377061	LOC642073	6.74549e-20	3.04098e-16
rs5007265	6	32378866	LOC642073	6.74549e-20	3.04098e-16
rs5007263	6	32378982	LOC642073	6.74549e-20	3.04098e-16
rs5007259	6	32379101	LOC642073	6.74549e-20	3.04098e-16
rs6932810	6	32380190	LOC642073	6.74549e-20	3.04098e-16
rs6932542	6	32380262	LOC642073	6.74549e-20	3.04098e-16
rs1883613	6	133077063	VNN3	6.79645e-20	3.06225e-16
rs8413	9	139323311	CARD9	7.14572e-20	3.21427e-16
rs467693	5	102167154	PAM	7.36361e-20	3.30862e-16
rs4800173	18	21619931	TTC39C	7.47877e-20	3.35665e-16
rs2131355	9	71128144	PGM5	7.67492e-20	3.44089e-16
rs2296971	13	115004914	CDC16	8.01717e-20	3.58411e-16
rs2296970	13	115004935	CDC16	8.01717e-20	3.58411e-16
rs2905	14	93693422	UBR7	8.0448e-20	3.59086e-16
rs11621915	14	93693831	UBR7	8.0448e-20	3.59086e-16
rs12669824	7	150483512	TMEM176A	8.29242e-20	3.69732e-16
rs734008	14	35816921	KIAA0391	8.69746e-20	3.86519e-16
rs1130276	11	831809	CD151	9.39122e-20	4.16894e-16
rs1638736	7	66092308	VKORC1L1	1.04238e-19	4.61973e-16
rs995232	13	115020319	CDC16	1.05775e-19	4.67768e-16
rs27141	5	64881936	SGTB	1.06483e-19	4.70128e-16
rs468308	5	64919618	SGTB	1.06483e-19	4.70128e-16
rs37254	5	64920803	SGTB	1.06483e-19	4.70128e-16
rs7126805	11	828916	CD151	1.06633e-19	4.70497e-16
rs12140722	1	213091573	LQK1	1.08767e-19	4.79169e-16
rs6679951	1	213093069	LQK1	1.08767e-19	4.79169e-16
rs613084	11	68603157	MRPL21	1.13236e-19	4.98588e-16
rs1039968	2	203557151	FAM117B	1.18443e-19	5.20388e-16
rs10781496	9	139261086	INPP5E	1.20322e-19	5.28359e-16
rs1894823	12	7890549	CLEC4C	1.241e-19	5.44357e-16
rs1476110	2	172373507	CYBRD1	1.31252e-19	5.74799e-16
rs2657433	5	101999586	PAM	1.34984e-19	5.90827e-16
rs1130663	11	837582	CD151	1.3573e-19	5.93133e-16
rs1130698	11	838542	CD151	1.3573e-19	5.93133e-16
rs3059	11	840319	CD151	1.3573e-19	5.93133e-16
rs1895213	5	102044072	Hs.482960	1.36016e-19	5.94061e-16
rs2799182	1	3696000	KIAA0562	1.41065e-19	6.1512e-16
rs8379	1	3696890	KIAA0562	1.41065e-19	6.1512e-16
rs10870194	9	139327034	CARD9	1.43437e-19	6.24126e-16
rs10781542	9	139327439	CARD9	1.43437e-19	6.24126e-16
rs3807306	7	128580680	IRF5	1.48285e-19	6.44875e-16
rs7522428	1	75178360	CRYZ	1.48725e-19	6.46441e-16
rs3807040	6	41170895	TREML3	1.6374e-19	7.09806e-16
rs11204737	1	150847647	ARNT	1.63956e-19	7.10364e-16
rs1729662	2	61391305	AHSA2	1.82338e-19	7.89163e-16
rs1130680	11	838424	CD151	1.8734e-19	8.07799e-16
rs6569843	6	133061091	VNN3	1.91492e-19	8.24827e-16
rs1131384	7	102113841	POLR2J	2.13408e-19	9.18743e-16
rs3770832	2	36738630	FEZ2	2.23301e-19	9.57778e-16
rs11596526	10	75847804	AP3M1	2.25356e-19	9.66084e-16
rs8039437	15	101114418	LINS1	2.2725e-19	9.73689e-16
rs10890142	1	75179129	CRYZ	2.36834e-19	1.01422e-15
rs2531725	17	56517962	TRIM37	2.37352e-19	1.0159e-15
rs589448	12	69752200	LYZ	2.60345e-19	1.1108e-15
rs6762	11	838722	CD151	2.65272e-19	1.13064e-15
rs3801839	7	26833021	SKAP2	2.66251e-19	1.13421e-15
rs720201	2	61376463	AHSA2	2.98891e-19	1.26582e-15
rs3124779	9	136281966	SURF6	2.99016e-19	1.26582e-15
rs27140	5	64881578	SGTB	2.99378e-19	1.2667e-15
rs11769057	7	99964661	PILRB	3.04007e-19	1.28495e-15
rs11204725	1	150742700	ARNT	3.23659e-19	1.36659e-15
rs12568757	1	150729793	ARNT	3.2996e-19	1.39174e-15
rs12125650	1	150760174	ARNT	3.2996e-19	1.39174e-15
rs2523685	6	31426256	LOC100129668	3.39089e-19	1.42803e-15
rs1006771	22	24314006	DDT	3.45547e-19	1.45296e-15
rs1624766	23	153317154	TMEM187	3.59572e-19	1.50726e-15
rs424970	9	71113835	PGM5	3.63863e-19	1.5221e-15
rs7581601	2	203497786	FAM117B	3.66945e-19	1.5342e-15
rs2280871	8	133722669	LRRC6	3.73115e-19	1.55788e-15
rs17435	23	153311980	TMEM187	3.73184e-19	1.55788e-15
rs633	23	153274228	TMEM187	3.80621e-19	1.58567e-15
rs3027898	23	153275890	TMEM187	3.80621e-19	1.58567e-15
rs8451	15	101109677	LINS1	3.84333e-19	1.59867e-15
rs11247226	15	101120963	LINS1	3.84333e-19	1.59867e-15
rs703842	12	58162739	FAM119B	3.95638e-19	1.64401e-15
rs6581155	12	58178162	FAM119B	3.95638e-19	1.64401e-15
rs367035	11	2923826	SLC22A18AS	4.10392e-19	1.70184e-15
rs4075289	11	830670	CD151	4.19332e-19	1.73714e-15
rs2739338	22	24297130	GSTT1	4.50838e-19	1.86102e-15
rs1127152	9	139335599	INPP5E	4.85981e-19	2.00303e-15
rs778732	7	65822360	VKORC1L1	5.06674e-19	2.08303e-15
rs11933855	4	1315183	CRIPAK	5.08555e-19	2.08971e-15
rs995232	13	115020319	CDC16	5.26474e-19	2.15897e-15
rs11761199	7	128581835	IRF5	5.44295e-19	2.2298e-15
rs705866	7	99965285	PILRB	5.48131e-19	2.24438e-15
rs10115705	9	34406384	NUDT2	5.61679e-19	2.29754e-15
rs11788070	9	34415648	NUDT2	5.61679e-19	2.29754e-15
rs2294758	6	133045812	VNN3	5.82016e-19	2.37728e-15
rs11914302	3	167552548	SERPINI1	5.96264e-19	2.43411e-15
rs10014526	4	1136910	CRIPAK	6.13672e-19	2.5014e-15
rs11937228	4	1147407	CRIPAK	6.13672e-19	2.5014e-15
rs928049	9	71120013	PGM5	6.16847e-19	2.51308e-15
rs6948685	7	99970188	PILRB	6.26496e-19	2.54983e-15
rs2109427	12	6592082	NCAPD2	6.45956e-19	2.61985e-15
rs1048402	12	6601175	NCAPD2	6.45956e-19	2.61985e-15
rs3180589	12	6602422	NCAPD2	6.45956e-19	2.61985e-15
rs7976498	12	6602433	NCAPD2	6.45956e-19	2.61985e-15
rs7134136	12	6609503	NCAPD2	6.45956e-19	2.61985e-15
rs11761253	7	99939321	PILRB	6.78161e-19	2.74772e-15
rs10877013	12	58165085	FAM119B	6.82573e-19	2.76422e-15
rs10085549	7	99983135	PILRB	6.85424e-19	2.77438e-15
rs2256974	6	31555392	LST1	6.92161e-19	2.79886e-15
rs28558789	11	829539	CD151	7.16169e-19	2.89229e-15
rs10877014	12	58167661	FAM119B	7.18827e-19	2.89229e-15
rs10877015	12	58167788	FAM119B	7.18827e-19	2.89229e-15
rs11172335	12	58175201	FAM119B	7.18827e-19	2.89229e-15
rs10431552	12	58178148	FAM119B	7.18827e-19	2.89229e-15
rs10783847	12	58196447	FAM119B	7.18827e-19	2.89229e-15
rs11172349	12	58212528	FAM119B	7.18827e-19	2.89229e-15
rs11172351	12	58213485	FAM119B	7.18827e-19	2.89229e-15
rs7914469	10	75786395	AP3M1	7.32608e-19	2.94483e-15
rs7812123	7	100211556	MOSPD3	7.74841e-19	3.11305e-15
rs7975825	12	131288444	STX2	7.98821e-19	3.20622e-15
rs6486600	12	131292977	STX2	7.98821e-19	3.20622e-15
rs10849488	12	6654050	IFFO1	8.10954e-19	3.25331e-15
rs2070865	21	40715519	HMGN1	8.14094e-19	3.2643e-15
rs4379550	9	139376426	INPP5E	8.26583e-19	3.30947e-15
rs9786814	24	22872115	EIF1AY	8.56664e-19	3.42653e-15
rs1130276	11	831809	CD151	8.65738e-19	3.46113e-15
rs1177283	2	61348804	LOC339804	8.69495e-19	3.47282e-15
rs302865	17	56756977	TRIM37	8.69519e-19	3.47282e-15
rs3848662	19	36216056	U2AF1L4	8.74999e-19	3.49132e-15
rs2489585	10	26985971	PDSS1	8.85712e-19	3.53229e-15
rs10877012	12	58162085	FAM119B	9.20138e-19	3.66418e-15
rs4728142	7	128573967	IRF5	9.56315e-19	3.80266e-15
rs806973	6	26148326	HIST1H2BD	9.91476e-19	3.93477e-15
rs10814110	9	34423806	NUDT2	9.98557e-19	3.96093e-15
rs12481228	20	34218673	CPNE1	1.05298e-18	4.15249e-15
rs6058303	20	34290281	CPNE1	1.05298e-18	4.15249e-15
rs11696947	20	34312658	CPNE1	1.05298e-18	4.15249e-15
rs11699044	20	34312713	CPNE1	1.05298e-18	4.15249e-15
rs11145750	9	139259249	CARD9	1.07521e-18	4.23808e-15
rs1734787	23	153325446	TMEM187	1.09456e-18	4.31018e-15
rs1130680	11	838424	CD151	1.11579e-18	4.39166e-15
rs7786877	7	100214015	MOSPD3	1.16801e-18	4.59273e-15
rs17103240	14	35831836	PPP2R3C	1.18532e-18	4.65855e-15
rs17103240	14	35831836	KIAA0391	1.20557e-18	4.73585e-15
rs28558789	11	829539	CD151	1.22293e-18	4.8017e-15
rs12890307	14	35452132	KIAA0391	1.23242e-18	4.82265e-15
rs6517523	21	40557332	HMGN1	1.25071e-18	4.89185e-15
rs11190786	10	102757442	SEMA4G	1.26723e-18	4.95408e-15
rs2295716	10	102744214	SEMA4G	1.27036e-18	4.95916e-15
rs722435	10	102745062	SEMA4G	1.27036e-18	4.95916e-15
rs2863095	10	102746503	SEMA4G	1.27036e-18	4.95916e-15
rs1734791	23	153330920	TMEM187	1.27396e-18	4.97083e-15
rs4240897	1	12042755	MFN2	1.31105e-18	5.10821e-15
rs1762482	1	107599002	PRMT6	1.35666e-18	5.2758e-15
rs1730859	1	107617707	PRMT6	1.35666e-18	5.2758e-15
rs11743287	5	7920843	MTRR	1.36423e-18	5.3027e-15
rs778139	2	61684564	LOC339804	1.40768e-18	5.46895e-15
rs17102970	14	35480569	KIAA0391	1.40948e-18	5.47334e-15
rs7153550	14	35501800	KIAA0391	1.43645e-18	5.57006e-15
rs2246012	6	131898208	ARG1	1.48088e-18	5.73416e-15
rs1177283	2	61348804	AHSA2	1.51326e-18	5.85673e-15
rs3812570	9	139275204	INPP5E	1.56924e-18	6.06474e-15
rs592206	12	10126427	CLEC12A	1.61424e-18	6.22384e-15
rs2295716	10	102744214	MRPL43	1.65612e-18	6.37321e-15
rs722435	10	102745062	MRPL43	1.65612e-18	6.37321e-15
rs2863095	10	102746503	MRPL43	1.65612e-18	6.37321e-15
rs6571303	23	153247954	CXorf12	1.67457e-18	6.44117e-15
rs7215451	17	74701717	JMJD6	1.69785e-18	6.52762e-15
rs11868472	17	74701165	JMJD6	1.70465e-18	6.54445e-15
rs7390	12	6571699	VAMP1	1.75741e-18	6.74384e-15
rs17103242	14	35832837	PPP2R3C	1.79554e-18	6.88363e-15
rs2266890	23	153247722	CXorf12	1.80165e-18	6.9038e-15
rs462957	5	102096425	Hs.482960	1.82937e-18	7.00341e-15
rs2269368	23	153189819	TMEM187	1.84081e-18	7.04059e-15
rs2071129	23	153195921	TMEM187	1.84081e-18	7.04059e-15
rs12532878	7	100212254	MOSPD3	1.88026e-18	7.1881e-15
rs160637	7	65584318	VKORC1L1	1.8859e-18	7.20628e-15
rs11570094	11	47359706	SPI1	1.94441e-18	7.42284e-15
rs1680032	4	1243573	KIAA1530	1.98296e-18	7.55934e-15
rs1732115	4	1244416	KIAA1530	1.98296e-18	7.55934e-15
rs888427	2	172368120	CYBRD1	2.07127e-18	7.88491e-15
rs7300836	12	7895804	CLEC4C	2.10115e-18	7.9949e-15
rs11769057	7	99964661	PILRB	2.13317e-18	8.11295e-15
rs1045452	12	6572048	VAMP1	2.15745e-18	8.19763e-15
rs2534712	12	6572549	VAMP1	2.15745e-18	8.19763e-15
rs1059702	23	153284192	TMEM187	2.16899e-18	8.23759e-15
rs7316224	12	6638666	NCAPD2	2.22017e-18	8.4241e-15
rs13074318	3	48816725	WDR6	2.29063e-18	8.65107e-15
rs11713694	3	48833615	WDR6	2.29063e-18	8.65107e-15
rs13087930	3	48961726	WDR6	2.29063e-18	8.65107e-15
rs11706052	3	49064110	WDR6	2.29063e-18	8.65107e-15
rs35673421	3	49139406	WDR6	2.29063e-18	8.65107e-15
rs5030795	3	49141116	WDR6	2.29063e-18	8.65107e-15
rs11552724	3	49156473	WDR6	2.29063e-18	8.65107e-15
rs11713297	3	49213030	WDR6	2.29063e-18	8.65107e-15
rs9837237	3	49215583	WDR6	2.29063e-18	8.65107e-15
rs9837625	3	49215966	WDR6	2.29063e-18	8.65107e-15
rs869945	1	224321637	FBXO28	2.30519e-18	8.70199e-15
rs3171292	20	1423909	NSFL1C	2.32992e-18	8.78719e-15
rs4617229	9	123480696	LOC253039	2.40191e-18	9.04608e-15
rs2416799	9	123480866	LOC253039	2.40191e-18	9.04608e-15
rs9911583	17	57210721	RAD51C	2.41769e-18	9.1013e-15
rs2249047	23	109203029	TMEM164	2.51102e-18	9.41772e-15
rs1024429	23	109206199	TMEM164	2.51102e-18	9.41772e-15
rs660614	11	68659488	IGHMBP2	2.58327e-18	9.67978e-15
rs629426	11	68671104	IGHMBP2	2.58327e-18	9.67978e-15
rs35283189	3	49113668	WDR6	2.58912e-18	9.69276e-15
rs34580506	3	49113713	WDR6	2.58912e-18	9.69276e-15
rs2069502	12	58144665	FAM119B	2.64595e-18	9.88727e-15
rs2702204	1	183457396	SMG7	2.65812e-18	9.92819e-15
rs4239889	22	38140352	TRIOBP	2.74425e-18	1.02405e-14
rs4886791	15	76596250	SCAPER	2.78764e-18	1.03833e-14
rs2532501	12	6562753	VAMP1	2.83731e-18	1.05538e-14
rs1476110	2	172373507	CYBRD1	2.90854e-18	1.0799e-14
rs10786612	10	102653765	MRPL43	3.00386e-18	1.11376e-14
rs7412746	1	150860471	ARNT	3.02955e-18	1.12175e-14
rs7126805	11	828916	CD151	3.08264e-18	1.14089e-14
rs11204695	1	150657011	ARNT	3.12862e-18	1.1558e-14
rs3865350	17	5381867	RABEP1	3.29192e-18	1.21502e-14
rs6120998	20	34187313	CPNE1	3.29765e-18	1.21658e-14
rs11712056	3	49914397	RBM6	3.33541e-18	1.22995e-14
rs5030779	11	837772	CD151	3.34373e-18	1.23246e-14
rs2097470	22	26904965	TFIP11	3.42066e-18	1.25911e-14
rs8328	1	224346959	FBXO28	3.54831e-18	1.30491e-14
rs9352004	6	74238511	EEF1A1	3.64661e-18	1.33985e-14
rs592206	12	10126427	CLEC12A	3.78412e-18	1.38786e-14
rs10049462	3	49309684	WDR6	3.90674e-18	1.4296e-14
rs8024825	15	101111932	LINS1	4.15017e-18	1.51663e-14
rs6569843	6	133061091	VNN2	4.21473e-18	1.53953e-14
rs619727	11	68627535	IGHMBP2	4.27661e-18	1.56074e-14
rs604524	11	68629929	IGHMBP2	4.27661e-18	1.56074e-14
rs964611	15	48597514	DUT	4.31129e-18	1.57127e-14
rs9899634	17	17727943	SREBF1	4.33777e-18	1.57809e-14
rs9902941	17	17733760	SREBF1	4.33777e-18	1.57809e-14
rs1889018	17	17734740	SREBF1	4.33777e-18	1.57809e-14
rs2472393	23	153771296	FAM3A	4.34428e-18	1.57905e-14
rs4898389	23	153827637	FAM3A	4.34428e-18	1.57905e-14
rs34566463	3	49245077	WDR6	4.48846e-18	1.62927e-14
rs11719220	3	49245201	WDR6	4.48846e-18	1.62927e-14
rs13077498	3	49313978	WDR6	4.48846e-18	1.62927e-14
rs4653564	1	224314814	FBXO28	4.54572e-18	1.64711e-14
rs3108680	1	107572997	PRMT6	4.62323e-18	1.6737e-14
rs11764045	7	100212754	MOSPD3	4.79675e-18	1.73266e-14
rs4414157	10	75808313	AP3M1	4.84073e-18	1.74776e-14
rs4711731	6	42897712	PEX6	4.85516e-18	1.7522e-14
rs13068038	3	49294250	WDR6	5.15521e-18	1.85922e-14
rs2131355	9	71128144	PGM5	5.15629e-18	1.85922e-14
rs2242601	7	143093824	ZYX	5.17369e-18	1.86467e-14
rs12786155	11	126138453	FAM118B	5.65157e-18	2.02433e-14
rs7954957	12	58299250	XRCC6BP1	5.72488e-18	2.04968e-14
rs1874230	6	74228049	EEF1A1	5.74439e-18	2.05501e-14
rs8067682	17	57219391	RAD51C	5.74483e-18	2.05501e-14
rs570840	7	26862139	SKAP2	5.85177e-18	2.09207e-14
rs11120025	1	212955231	NSL1	5.85357e-18	2.09207e-14
rs2291617	12	58166403	FAM119B	5.88106e-18	2.10097e-14
rs2275675	1	183439483	SMG7	6.02606e-18	2.15088e-14
rs529268	12	69687051	LYZ	6.22385e-18	2.21758e-14
rs10870202	9	139257411	CARD9	6.30453e-18	2.24436e-14
rs4378078	9	139375962	CARD9	6.51131e-18	2.31492e-14
rs4619875	4	153701130	ARFIP1	6.57366e-18	2.33607e-14
rs2295283	1	12082926	MFN2	6.68486e-18	2.37455e-14
rs1056879	14	35591174	PPP2R3C	6.70534e-18	2.38078e-14
rs636049	11	68667198	IGHMBP2	6.74042e-18	2.39219e-14
rs1052299	17	17750419	SREBF1	6.80602e-18	2.41336e-14
rs11711407	3	50225029	RBM6	7.02808e-18	2.48776e-14
rs873477	16	455646	NME4	7.1356e-18	2.52362e-14
rs3785290	16	456483	NME4	7.1356e-18	2.52362e-14
rs11190786	10	102757442	MRPL43	7.45842e-18	2.63092e-14
rs946847	9	34408204	NUDT2	7.48225e-18	2.63818e-14
rs9915248	17	17747514	SREBF1	7.50411e-18	2.64359e-14
rs3744115	17	17749822	SREBF1	7.50411e-18	2.64359e-14
rs10814110	9	34423806	NUDT2	7.74031e-18	2.72562e-14
rs10115705	9	34406384	NUDT2	8.20871e-18	2.88431e-14
rs11788070	9	34415648	NUDT2	8.20871e-18	2.88431e-14
rs4774967	15	57855760	GCOM1	8.26856e-18	2.90408e-14
rs2075674	7	100225031	MOSPD3	8.36428e-18	2.93516e-14
rs1894823	12	7890549	CLEC4C	1.0049e-17	3.50665e-14
rs1890470	20	34357008	CPNE1	1.00734e-17	3.51369e-14
rs13063	20	1423848	NSFL1C	1.00891e-17	3.51764e-14
rs8177374	11	126162843	FAM118B	1.02837e-17	3.58394e-14
rs11761253	7	99939321	PILRB	1.09446e-17	3.80287e-14
rs3813181	23	109244873	TMEM164	1.10007e-17	3.8207e-14
rs6493311	15	48539587	DUT	1.12596e-17	3.90563e-14
rs1186706	2	61673394	LOC339804	1.12735e-17	3.90877e-14
rs4919510	10	102734778	SEMA4G	1.13604e-17	3.93722e-14
rs12470651	2	55384062	C2orf63	1.17803e-17	4.07582e-14
rs888427	2	172368120	CYBRD1	1.17937e-17	4.0787e-14
rs1491931	12	40545096	Hs.306876	1.19542e-17	4.13245e-14
rs1127152	9	139335599	CARD9	1.22505e-17	4.23126e-14
rs4808279	19	21752009	ZNF429	1.22886e-17	4.24081e-14
rs12669824	7	150483512	TMEM176B	1.23777e-17	4.26794e-14
rs1002286	22	24257337	DDT	1.24362e-17	4.28448e-14
rs9786814	24	22872115	EIF1AY	1.29281e-17	4.45205e-14
rs12241379	10	102052373	PKD2L1	1.33596e-17	4.59481e-14
rs33394	5	64778944	SGTB	1.34465e-17	4.62275e-14
rs13625	21	40669083	HMGN1	1.36315e-17	4.68437e-14
rs1130694	20	25276297	PYGB	1.3806e-17	4.74032e-14
rs2236057	1	12062205	PLOD1	1.41703e-17	4.86335e-14
rs1054283	8	79610710	FAM164A	1.44286e-17	4.94155e-14
rs7097428	10	114105294	ACSL5	1.49174e-17	5.1025e-14
rs4800173	18	21619931	Hs.579530	1.50975e-17	5.15976e-14
rs777584	2	61410346	AHSA2	1.53653e-17	5.24908e-14
rs6948685	7	99970188	PILRB	1.54632e-17	5.2803e-14
rs2309399	17	5391690	RABEP1	1.59096e-17	5.42817e-14
rs1026920	8	79632010	FAM164A	1.63421e-17	5.57105e-14
rs1265923	4	1209174	KIAA1530	1.65328e-17	5.63136e-14
rs11908296	20	47841660	LOC100132096	1.71366e-17	5.82238e-14
rs11667640	19	45379791	PVRL2	1.73851e-17	5.89153e-14
rs8034192	15	48541394	DUT	1.73982e-17	5.89153e-14
rs8032420	15	48545381	DUT	1.73982e-17	5.89153e-14
rs6493317	15	48568156	DUT	1.73982e-17	5.89153e-14
rs6493318	15	48568259	DUT	1.73982e-17	5.89153e-14
rs8040405	15	48572837	DUT	1.73982e-17	5.89153e-14
rs10152424	15	48591987	DUT	1.73982e-17	5.89153e-14
rs869945	1	224321637	FBXO28	1.74977e-17	5.92277e-14
rs2781668	6	131897278	ARG1	1.84175e-17	6.22372e-14
rs11720964	3	49336232	WDR6	1.85939e-17	6.27813e-14
rs8079321	17	17760789	SREBF1	1.86799e-17	6.29929e-14
rs12941039	17	17765655	SREBF1	1.86799e-17	6.29929e-14
rs9907246	17	17770965	SREBF1	1.86799e-17	6.29929e-14
rs592206	12	10126427	CLEC12A	1.87718e-17	6.31979e-14
rs17552047	13	53602462	OLFM4	1.95859e-17	6.5857e-14
rs6042462	20	1448477	NSFL1C	1.97867e-17	6.64772e-14
rs2108202	1	44395786	CCDC24	1.99568e-17	6.70209e-14
rs11078400	17	17757728	SREBF1	2.06535e-17	6.91552e-14
rs4472444	7	100070758	PILRB	2.06605e-17	6.91552e-14
rs7809801	7	100072031	PILRB	2.06605e-17	6.91552e-14
rs11766752	7	100073292	PILRB	2.06605e-17	6.91552e-14
rs11763511	7	100081944	PILRB	2.06605e-17	6.91552e-14
rs4718223	7	64770261	VKORC1L1	2.08713e-17	6.97458e-14
rs13244870	7	64794391	VKORC1L1	2.08713e-17	6.97458e-14
rs730830	4	1240091	KIAA1530	2.10699e-17	7.02073e-14
rs13397	23	153248248	TMEM187	2.16792e-17	7.22082e-14
rs6581889	12	69757429	YEATS4	2.208e-17	7.33926e-14
rs4653564	1	224314814	FBXO28	2.22932e-17	7.40647e-14
rs844895	20	23113092	CD93	2.23442e-17	7.41797e-14
rs12886745	14	104523839	TDRD9	2.26018e-17	7.49738e-14
rs8032357	15	48618819	DUT	2.30444e-17	7.63795e-14
rs12592155	15	48623500	DUT	2.30444e-17	7.63795e-14
rs2240259	17	56458129	RAD51C	2.35791e-17	7.80244e-14
rs17103242	14	35832837	KIAA0391	2.36685e-17	7.82883e-14
rs10744034	12	7880551	CLEC4C	2.47495e-17	8.17975e-14
rs2109427	12	6592082	VAMP1	2.56773e-17	8.46227e-14
rs1048402	12	6601175	VAMP1	2.56773e-17	8.46227e-14
rs3180589	12	6602422	VAMP1	2.56773e-17	8.46227e-14
rs7976498	12	6602433	VAMP1	2.56773e-17	8.46227e-14
rs7134136	12	6609503	VAMP1	2.56773e-17	8.46227e-14
rs10149651	14	104394440	TDRD9	2.62687e-17	8.63964e-14
rs3898352	15	76521770	SCAPER	2.70238e-17	8.88439e-14
rs1324473	9	123404610	LOC253039	2.71412e-17	8.91218e-14
rs966396	9	123453281	LOC253039	2.71412e-17	8.91218e-14
rs34677	5	33998768	AMACR	2.74601e-17	9.00961e-14
rs17102970	14	35480569	PPP2R3C	2.77028e-17	9.08556e-14
rs2428427	7	27111195	Hs.445239	2.87627e-17	9.41416e-14
rs10134257	14	23445536	PRMT5	2.91212e-17	9.52768e-14
rs40507	5	34003361	AMACR	2.92244e-17	9.55375e-14
rs190418	5	34011356	AMACR	2.92244e-17	9.55375e-14
rs9889419	17	56473259	TRIM37	2.95391e-17	9.64497e-14
rs7300366	12	6652227	IFFO1	2.9757e-17	9.70832e-14
rs3933343	9	34395816	NUDT2	3.00845e-17	9.81122e-14
rs9453	14	100808845	SLC25A29	3.04163e-17	9.9115e-14
rs1009812	14	100820980	SLC25A29	3.04163e-17	9.9115e-14
rs4671401	2	61473148	AHSA2	3.06704e-17	9.99028e-14
rs3808619	8	79577726	FAM164A	3.09678e-17	1.00831e-13
rs4746166	10	75778687	ADK	3.10758e-17	1.01142e-13
rs3803752	17	56540267	RAD51C	3.115e-17	1.01302e-13
rs2007993	17	56590643	RAD51C	3.115e-17	1.01302e-13
rs13311400	7	26954746	Hs.445239	3.13012e-17	1.01754e-13
rs4657741	1	168149142	TIPRL	3.21339e-17	1.04335e-13
rs1021156	8	79575804	FAM164A	3.22214e-17	1.04468e-13
rs553877	9	136214955	SURF6	3.32786e-17	1.07707e-13
rs12763	9	136227260	SURF6	3.32786e-17	1.07707e-13
rs467693	5	102167154	Hs.482960	3.35904e-17	1.08587e-13
rs9786758	24	21306315	JARID1D	3.48313e-17	1.12509e-13
rs10957898	8	79617313	FAM164A	3.53154e-17	1.13982e-13
rs4761154	12	69705362	YEATS4	3.56491e-17	1.14968e-13
rs10878964	12	69720691	YEATS4	3.56491e-17	1.14968e-13
rs1000215	7	100004543	PILRB	3.60219e-17	1.15848e-13
rs1073	7	100031612	PILRB	3.60219e-17	1.15848e-13
rs4074838	7	100032665	PILRB	3.60219e-17	1.15848e-13
rs11761784	7	100039970	PILRB	3.60219e-17	1.15848e-13
rs28578163	7	100044754	PILRB	3.60219e-17	1.15848e-13
rs6569843	6	133061091	VNN3	3.65044e-17	1.1726e-13
rs1128905	9	139253839	CARD9	3.7357e-17	1.19904e-13
rs12051897	17	57207540	TRIM37	3.78588e-17	1.21466e-13
rs6000898	22	38202399	TRIOBP	3.8878e-17	1.24491e-13
rs10085549	7	99983135	PILRB	3.92822e-17	1.25686e-13
rs1884655	20	23074375	CD93	3.93216e-17	1.25763e-13
rs2425149	20	34359587	CPNE1	3.9827e-17	1.27179e-13
rs11760536	7	100078754	PILRB	4.08097e-17	1.30166e-13
rs2839207	21	47717686	C21orf57	4.08104e-17	1.30166e-13
rs3747007	21	47721739	C21orf57	4.08104e-17	1.30166e-13
rs4660761	1	44440146	CCDC24	4.08862e-17	1.30305e-13
rs12410334	1	44442521	CCDC24	4.08862e-17	1.30305e-13
rs4820303	22	38134166	TRIOBP	4.14317e-17	1.31992e-13
rs9303399	17	56672309	RAD51C	4.18017e-17	1.33014e-13
rs2306159	10	114200355	ACSL5	4.31569e-17	1.37165e-13
rs3784616	15	48570578	DUT	4.31859e-17	1.37204e-13
rs16943176	17	56769887	RAD51C	4.37731e-17	1.38527e-13
rs17222691	17	56771096	RAD51C	4.37731e-17	1.38527e-13
rs17822908	17	56801778	RAD51C	4.37731e-17	1.38527e-13
rs12952325	17	56899371	RAD51C	4.37731e-17	1.38527e-13
rs12935851	17	56600244	RAD51C	4.37731e-17	1.38527e-13
rs35288118	17	56600748	RAD51C	4.37731e-17	1.38527e-13
rs17822735	17	56620167	RAD51C	4.37731e-17	1.38527e-13
rs7783159	7	100017454	PILRB	4.39298e-17	1.38969e-13
rs2239464	23	153348431	CXorf12	4.41774e-17	1.39698e-13
rs11037858	11	44110690	ACCS	4.43026e-17	1.39985e-13
rs34677	5	33998768	AMACR	4.47081e-17	1.41211e-13
rs4472444	7	100070758	PILRB	4.51772e-17	1.42416e-13
rs7809801	7	100072031	PILRB	4.51772e-17	1.42416e-13
rs11766752	7	100073292	PILRB	4.51772e-17	1.42416e-13
rs11763511	7	100081944	PILRB	4.51772e-17	1.42416e-13
rs4853700	2	191264390	MFSD6	4.63472e-17	1.45935e-13
rs11769886	7	99998607	PILRB	4.65225e-17	1.46316e-13
rs11761725	7	100039815	PILRB	4.65225e-17	1.46316e-13
rs2406255	7	100053690	PILRB	4.65225e-17	1.46316e-13
rs842273	3	16328356	DPH3	4.87713e-17	1.53152e-13
rs4379550	9	139376426	CARD9	4.91762e-17	1.54304e-13
rs2291193	17	57272079	RAD51C	4.93649e-17	1.54594e-13
rs1000215	7	100004543	PILRB	4.93827e-17	1.54594e-13
rs1073	7	100031612	PILRB	4.93827e-17	1.54594e-13
rs4074838	7	100032665	PILRB	4.93827e-17	1.54594e-13
rs11761784	7	100039970	PILRB	4.93827e-17	1.54594e-13
rs28578163	7	100044754	PILRB	4.93827e-17	1.54594e-13
rs8328	1	224346959	FBXO28	5.03282e-17	1.57432e-13
rs11706408	3	12587133	MKRN2	5.12462e-17	1.60242e-13
rs10087	3	16301148	DPH3	5.342e-17	1.66591e-13
rs842259	3	16312564	DPH3	5.342e-17	1.66591e-13
rs842274	3	16327855	DPH3	5.342e-17	1.66591e-13
rs842270	3	16332988	DPH3	5.342e-17	1.66591e-13
rs1088550	13	33036660	PFAAP5	5.43834e-17	1.69335e-13
rs3809724	17	57061238	RAD51C	5.4563e-17	1.69829e-13
rs4077563	3	125769757	SLC41A3	5.57128e-17	1.73275e-13
rs7070744	10	114197642	ACSL5	5.69578e-17	1.77012e-13
rs4951774	1	33314700	S100PBP	5.7479e-17	1.78495e-13
rs6493316	15	48567477	DUT	6.01456e-17	1.86491e-13
rs4919510	10	102734778	MRPL43	6.21045e-17	1.92417e-13
rs10853008	17	56993407	TRIM37	6.22648e-17	1.92841e-13
rs2302479	7	150488616	ABP1	6.26111e-17	1.93839e-13
rs11621391	14	35834558	PPP2R3C	6.55776e-17	2.02483e-13
rs4886707	15	75755467	MAN2C1	6.62522e-17	2.04488e-13
rs1007888	22	24241101	DDT	6.68446e-17	2.06239e-13
rs2231700	12	69653146	LYZ	6.71235e-17	2.0702e-13
rs2276817	3	52860936	ITIH4	6.73981e-17	2.07631e-13
rs7980936	12	69661131	LYZ	6.76713e-17	2.08393e-13
rs17139634	7	64902831	VKORC1L1	6.79977e-17	2.0924e-13
rs2285177	22	38205894	TRIOBP	6.82242e-17	2.09857e-13
rs4918752	10	114205389	ACSL5	6.86861e-17	2.11039e-13
rs1021469	12	58208164	FAM119B	7.00601e-17	2.14935e-13
rs11703407	22	38200124	TRIOBP	7.25738e-17	2.22227e-13
rs7271036	20	34467215	CPNE1	7.3791e-17	2.25106e-13
rs6060676	20	34498551	CPNE1	7.3791e-17	2.25106e-13
rs6060677	20	34499368	CPNE1	7.3791e-17	2.25106e-13
rs11089056	21	47720357	C21orf57	7.41307e-17	2.26057e-13
rs592206	12	10126427	CLEC12A	7.44567e-17	2.26966e-13
rs4974559	4	1380848	CRIPAK	7.51397e-17	2.28962e-13
rs9908279	17	57280100	RAD51C	7.53938e-17	2.2965e-13
rs1439875	2	143638569	KYNU	7.58949e-17	2.31063e-13
rs4879785	9	34396346	NUDT2	7.60122e-17	2.31274e-13
rs12150874	19	9414155	ZNF266	7.79824e-17	2.37002e-13
rs8077052	17	57208921	RAD51C	7.82973e-17	2.3787e-13
rs4893442	23	109227951	TMEM164	7.9712e-17	2.41987e-13
rs17431878	20	34502107	CPNE1	8.07444e-17	2.44938e-13
rs7602496	2	203602207	FAM117B	8.10661e-17	2.45822e-13
rs9786814	24	22872115	RPS4Y2	8.19242e-17	2.48331e-13
rs886090	9	136199503	MED22	8.45237e-17	2.55829e-13
rs2236620	22	24222710	GSTT1	8.58529e-17	2.59659e-13
rs16943326	17	57050365	RAD51C	8.90703e-17	2.6919e-13
rs462957	5	102096425	PAM	9.36797e-17	2.827e-13
rs2236247	14	104378087	TDRD9	9.66221e-17	2.91038e-13
rs633	23	153274228	CXorf12	9.7034e-17	2.92062e-13
rs3027898	23	153275890	CXorf12	9.7034e-17	2.92062e-13
rs842273	3	16328356	DPH3	1.00414e-16	3.02013e-13
rs8106959	19	36219525	U2AF1L4	1.02454e-16	3.07691e-13
rs11732223	4	153681139	ARFIP1	1.04405e-16	3.12974e-13
rs7674876	4	153688776	ARFIP1	1.04405e-16	3.12974e-13
rs6839340	4	153689963	ARFIP1	1.04405e-16	3.12974e-13
rs4276265	4	153695779	ARFIP1	1.04405e-16	3.12974e-13
rs6850467	4	153696635	ARFIP1	1.04405e-16	3.12974e-13
rs11621391	14	35834558	KIAA0391	1.05355e-16	3.15703e-13
rs2844529	6	31353593	LOC100129668	1.06612e-16	3.18531e-13
rs2428486	6	31354104	LOC100129668	1.06612e-16	3.18531e-13
rs2596562	6	31354595	LOC100129668	1.06612e-16	3.18531e-13
rs2523475	6	31361710	LOC100129668	1.06612e-16	3.18531e-13
rs2596542	6	31366595	LOC100129668	1.06612e-16	3.18531e-13
rs2428475	6	31366622	LOC100129668	1.06612e-16	3.18531e-13
rs2844521	6	31368964	LOC100129668	1.06612e-16	3.18531e-13
rs3754211	1	150951857	ARNT	1.1052e-16	3.29721e-13
rs11719291	3	48735706	WDR6	1.12577e-16	3.35367e-13
rs11706983	3	48738678	WDR6	1.12577e-16	3.35367e-13
rs9882549	3	48749358	WDR6	1.12577e-16	3.35367e-13
rs1208993	1	12095868	MFN2	1.13566e-16	3.38063e-13
rs9858428	3	49877585	WDR6	1.13793e-16	3.38617e-13
rs6512047	19	9437812	ZNF266	1.14743e-16	3.41192e-13
rs10411146	19	9438867	ZNF266	1.14743e-16	3.41192e-13
rs2251731	6	31367365	LOC100129668	1.16532e-16	3.46384e-13
rs10745023	19	9413896	ZNF266	1.16963e-16	3.4754e-13
rs302335	12	29905322	TMTC1	1.17799e-16	3.49768e-13
rs11654986	17	57206124	TRIM37	1.18376e-16	3.51352e-13
rs1665272	2	61379286	LOC339804	1.21788e-16	3.60822e-13
rs10489328	1	175113118	KIAA0040	1.24655e-16	3.69046e-13
rs5942873	23	109248535	TMEM164	1.29185e-16	3.81482e-13
rs4893445	23	109250572	TMEM164	1.29185e-16	3.81482e-13
rs7453	20	25207074	PYGB	1.33372e-16	3.93418e-13
rs10087	3	16301148	DPH3	1.35336e-16	3.98488e-13
rs842259	3	16312564	DPH3	1.35336e-16	3.98488e-13
rs842274	3	16327855	DPH3	1.35336e-16	3.98488e-13
rs842270	3	16332988	DPH3	1.35336e-16	3.98488e-13
rs2523453	6	31368125	LOC100129668	1.35779e-16	3.99517e-13
rs701836	10	102767117	MRPL43	1.41663e-16	4.16514e-13
rs13407913	2	25097644	DNAJC27	1.41928e-16	4.17143e-13
rs2000468	22	24241611	DDT	1.45246e-16	4.26433e-13
rs705866	7	99965285	PILRB	1.4627e-16	4.29284e-13
rs7574631	2	61825142	AHSA2	1.47032e-16	4.31363e-13
rs8128191	21	40527311	HMGN1	1.49554e-16	4.38288e-13
rs14194	21	40549466	HMGN1	1.49554e-16	4.38288e-13
rs589448	12	69752200	YEATS4	1.53061e-16	4.4792e-13
rs10024529	4	1363886	KIAA1530	1.54551e-16	4.51888e-13
rs9562157	13	114981356	CDC16	1.54584e-16	4.51888e-13
rs1208988	1	12087749	MFN2	1.60947e-16	4.69812e-13
rs1556822	10	76437114	ADK	1.68815e-16	4.91894e-13
rs974416	12	40515388	Hs.306876	1.72631e-16	5.02474e-13
rs6503900	17	57263393	RAD51C	1.73677e-16	5.05157e-13
rs3744383	17	57290383	RAD51C	1.73677e-16	5.05157e-13
rs7644746	3	183596184	PARL	1.75083e-16	5.09063e-13
rs2416760	9	123374639	LOC253039	1.75616e-16	5.10431e-13
rs3817604	4	1291337	KIAA1530	1.76543e-16	5.12574e-13
rs28429103	4	1320023	KIAA1530	1.76543e-16	5.12574e-13
rs6942306	6	133055170	VNN3	1.77632e-16	5.15551e-13
rs7904244	10	114066230	ACSL5	1.84433e-16	5.34718e-13
rs4739134	8	79556148	FAM164A	1.86206e-16	5.39282e-13
rs1966115	8	79556891	FAM164A	1.86206e-16	5.39282e-13
rs15895	12	113448288	OAS1	1.91448e-16	5.53278e-13
rs4775748	15	48638795	DUT	2.0877e-16	6.01627e-13
rs577372	6	74200726	EEF1A1	2.10792e-16	6.0724e-13
rs7594191	2	61840018	AHSA2	2.11783e-16	6.09878e-13
rs12451431	17	57310987	RAD51C	2.12363e-16	6.1133e-13
rs2267952	6	133067782	VNN3	2.19504e-16	6.31216e-13
rs2279366	15	48542027	DUT	2.21477e-16	6.36665e-13
rs7919710	10	114169552	ACSL5	2.23426e-16	6.41813e-13
rs597411	9	136192624	SURF6	2.25331e-16	6.46144e-13
rs9562157	13	114981356	CDC16	2.32202e-16	6.65141e-13
rs10415281	19	9599034	ZNF266	2.37166e-16	6.78166e-13
rs2000467	22	24241533	DDT	2.39905e-16	6.85757e-13
rs12904216	15	48523267	DUT	2.4381e-16	6.96673e-13
rs2600665	2	61405795	AHSA2	2.47144e-16	7.05952e-13
rs2167566	2	61519408	AHSA2	2.5112e-16	7.1605e-13
rs494024	11	34464748	CAT	2.57284e-16	7.32341e-13
rs524167	11	34467538	CAT	2.57284e-16	7.32341e-13
rs511895	11	34487729	CAT	2.57284e-16	7.32341e-13
rs499406	11	34491941	CAT	2.57284e-16	7.32341e-13
rs475043	11	34493801	CAT	2.57284e-16	7.32341e-13
rs1806651	3	125809971	SLC41A3	2.61719e-16	7.44443e-13
rs13311400	7	26954746	SKAP2	2.64959e-16	7.53133e-13
rs1729662	2	61391305	LOC339804	2.66846e-16	7.57701e-13
rs12460	15	101109818	LINS1	2.69209e-16	7.63875e-13
rs2267952	6	133067782	VNN3	2.71449e-16	7.69962e-13
rs2277872	1	156246728	TMEM79	2.75367e-16	7.80802e-13
rs12951376	17	17752809	SREBF1	2.80601e-16	7.95081e-13
rs9562157	13	114981356	CDC16	2.80696e-16	7.95081e-13
rs11760536	7	100078754	PILRB	2.81381e-16	7.96743e-13
rs2441381	2	61798829	AHSA2	2.83293e-16	8.01599e-13
rs2305641	12	69646914	YEATS4	2.92833e-16	8.27728e-13
rs6581886	12	69615090	LYZ	2.99555e-16	8.46139e-13
rs11623624	14	23406108	PRMT5	3.06657e-16	8.65599e-13
rs4766497	12	110950376	C12orf24	3.0894e-16	8.7174e-13
rs1874328	7	128585104	IRF5	3.09062e-16	8.71781e-13
rs622082	11	68703959	IGHMBP2	3.106e-16	8.75513e-13
rs546382	11	68704264	IGHMBP2	3.106e-16	8.75513e-13
rs7581854	2	203606754	FAM117B	3.11051e-16	8.7648e-13
rs2131355	9	71128144	PGM5	3.233e-16	9.09102e-13
rs6752483	2	25120086	DNAJC27	3.29585e-16	9.21989e-13
rs950966	17	17783748	SREBF1	3.35211e-16	9.36528e-13
rs7222480	17	17818817	SREBF1	3.35211e-16	9.36528e-13
rs10048206	17	17866897	SREBF1	3.35211e-16	9.36528e-13
rs2180834	14	23440404	PRMT5	3.36443e-16	9.38587e-13
rs734008	14	35816921	PPP2R3C	3.53414e-16	9.84918e-13
rs9839782	3	122287289	CCDC58	3.53921e-16	9.85991e-13
rs738033	22	17599844	CECR6	3.57241e-16	9.94901e-13
rs13432396	2	203469588	FAM117B	3.58443e-16	9.97905e-13
rs3756784	6	131950233	ARG1	3.58615e-16	9.98042e-13
rs4257260	17	17857003	SREBF1	3.6266e-16	1.00861e-12
rs2351117	2	203627412	FAM117B	3.64726e-16	1.01331e-12
rs11685819	2	203628757	FAM117B	3.64726e-16	1.01331e-12
rs11680951	2	203631359	FAM117B	3.64726e-16	1.01331e-12
rs11120027	1	212962207	LQK1	3.65762e-16	1.01584e-12
rs12917438	15	48639737	DUT	3.66941e-16	1.01877e-12
rs736408	3	52835354	ITIH4	3.68453e-16	1.02262e-12
rs10409392	19	18699333	C19orf60	3.8216e-16	1.05994e-12
rs6445538	3	52874288	ITIH4	3.85593e-16	1.06837e-12
rs6445539	3	52874296	ITIH4	3.85593e-16	1.06837e-12
rs935861	2	61479010	AHSA2	3.98623e-16	1.10221e-12
rs946847	9	34408204	NUDT2	4.0261e-16	1.11248e-12
rs4634868	1	38465315	FHL3	4.07344e-16	1.12518e-12
rs8077538	17	241835	C17orf97	4.13218e-16	1.14063e-12
rs4759187	12	56075263	CD63	4.18913e-16	1.15478e-12
rs8039653	15	48572635	DUT	4.19539e-16	1.15611e-12
rs7135092	12	69658330	YEATS4	4.24154e-16	1.16764e-12
rs11929532	3	196038384	TCTEX1D2	4.30211e-16	1.18209e-12
rs7300266	12	69654187	YEATS4	4.30277e-16	1.18209e-12
rs7308481	12	69659299	YEATS4	4.30277e-16	1.18209e-12
rs670712	11	126060666	FAM118B	4.39143e-16	1.20604e-12
rs11078406	17	17840823	SREBF1	4.42382e-16	1.21453e-12
rs560807	11	34468639	CAT	4.42622e-16	1.21478e-12
rs6545790	2	25109302	DNAJC27	4.43759e-16	1.21748e-12
rs3809878	17	40094835	NT5C3L	4.4641e-16	1.22434e-12
rs10786612	10	102653765	SEMA4G	4.49032e-16	1.23112e-12
rs1056295	10	102715183	SEMA4G	4.51196e-16	1.23662e-12
rs12441867	15	48636053	DUT	4.51344e-16	1.23662e-12
rs6778879	3	196023385	TCTEX1D2	4.6737e-16	1.27838e-12
rs11769886	7	99998607	PILRB	4.7794e-16	1.30509e-12
rs11761725	7	100039815	PILRB	4.7794e-16	1.30509e-12
rs2406255	7	100053690	PILRB	4.7794e-16	1.30509e-12
rs3171292	20	1423909	NSFL1C	4.78747e-16	1.30686e-12
rs12890307	14	35452132	PPP2R3C	4.88555e-16	1.33273e-12
rs2836992	21	40735606	HMGN1	5.07101e-16	1.38286e-12
rs6726261	2	25153986	ADCY3	5.31395e-16	1.44571e-12
rs11731367	4	76817412	NAAA	5.39092e-16	1.46469e-12
rs13038202	20	47835618	LOC100132096	5.39479e-16	1.46476e-12
rs2273145	20	47839591	LOC100132096	5.39479e-16	1.46476e-12
rs9381225	6	42879289	PEX6	5.48269e-16	1.48764e-12
rs6700410	1	213006397	NSL1	5.57185e-16	1.51082e-12
rs4951638	1	212931215	LQK1	5.79466e-16	1.56862e-12
rs11155685	6	150102785	NUP43	5.81238e-16	1.57289e-12
rs10783850	12	58229377	FAM119B	5.82143e-16	1.57481e-12
rs2112449	5	94019780	ANKRD32	5.89745e-16	1.59325e-12
rs2112448	5	94038410	ANKRD32	5.89745e-16	1.59325e-12
rs4760332	12	58222672	FAM119B	5.93614e-16	1.60264e-12
rs10783851	12	58231155	FAM119B	5.93614e-16	1.60264e-12
rs10872653	6	150100043	NUP43	5.99339e-16	1.61756e-12
rs8032357	15	48618819	DUT	6.02413e-16	1.62478e-12
rs12592155	15	48623500	DUT	6.02413e-16	1.62478e-12
rs7783159	7	100017454	PILRB	6.02933e-16	1.62564e-12
rs1002352	9	34399002	NUDT2	6.11438e-16	1.64639e-12
rs1883613	6	133077063	VNN3	6.20412e-16	1.66779e-12
rs9478848	6	150146216	NUP43	6.23485e-16	1.67494e-12
rs1865040	19	9457246	ZNF266	6.35579e-16	1.7063e-12
rs1203010	19	9669468	ZNF266	6.63827e-16	1.77978e-12
rs3026101	17	5280440	RABEP1	6.66942e-16	1.78754e-12
rs12118488	1	58939502	TACSTD2	6.69021e-16	1.79193e-12
rs10489815	1	58949510	TACSTD2	6.69021e-16	1.79193e-12
rs3173833	7	150491084	ABP1	6.69589e-16	1.79286e-12
rs13063	20	1423848	NSFL1C	6.87117e-16	1.83858e-12
rs9911583	17	57210721	RAD51C	6.90112e-16	1.84599e-12
rs4728142	7	128573967	IRF5	6.94746e-16	1.85594e-12
rs4799431	18	34304107	C18orf10	6.9704e-16	1.86084e-12
rs11731367	4	76817412	NAAA	7.00067e-16	1.8677e-12
rs1762482	1	107599002	PRMT6	7.01184e-16	1.86945e-12
rs1730859	1	107617707	PRMT6	7.01184e-16	1.86945e-12
rs1624766	23	153317154	CXorf12	7.15855e-16	1.90606e-12
rs9688412	6	150124283	NUP43	7.32112e-16	1.9468e-12
rs2151913	6	150130642	NUP43	7.32112e-16	1.9468e-12
rs7818	6	150132092	NUP43	7.32112e-16	1.9468e-12
rs2269368	23	153189819	CXorf12	7.36186e-16	1.95571e-12
rs2071129	23	153195921	CXorf12	7.36186e-16	1.95571e-12
rs1056295	10	102715183	MRPL43	7.5912e-16	2.01532e-12
rs979564	8	79576159	FAM164A	7.84184e-16	2.07914e-12
rs4641056	8	79582496	FAM164A	7.84184e-16	2.07914e-12
rs2717540	8	79622363	FAM164A	7.84184e-16	2.07914e-12
rs931749	19	38818925	C19orf33	7.89121e-16	2.09155e-12
rs1884391	20	1416066	NSFL1C	7.98042e-16	2.11381e-12
rs1250116	4	1224587	KIAA1530	8.01801e-16	2.12239e-12
rs884421	4	1227469	KIAA1530	8.01801e-16	2.12239e-12
rs1124667	5	94012979	ANKRD32	8.07491e-16	2.13536e-12
rs2258719	20	25275843	PYGB	8.1773e-16	2.15682e-12
rs6037103	20	25369095	PYGB	8.1773e-16	2.15682e-12
rs2387881	20	25378172	PYGB	8.1773e-16	2.15682e-12
rs6083853	20	25404541	PYGB	8.1773e-16	2.15682e-12
rs2482918	20	25412135	PYGB	8.1773e-16	2.15682e-12
rs6050631	20	25431749	PYGB	8.1773e-16	2.15682e-12
rs4775749	15	48642261	DUT	8.21454e-16	2.16453e-12
rs7704785	5	57790337	GAPT	8.44238e-16	2.22241e-12
rs1389308	5	57791311	GAPT	8.44238e-16	2.22241e-12
rs8067682	17	57219391	RAD51C	8.54438e-16	2.24707e-12
rs1765223	1	33256884	S100PBP	8.57965e-16	2.25562e-12
rs10134257	14	23445536	PRMT5	8.84403e-16	2.32137e-12
rs3171465	21	40552307	HMGN1	9.08084e-16	2.38275e-12
rs12195866	6	150014470	NUP43	9.17216e-16	2.40516e-12
rs6668352	1	11914829	MTHFR	9.54061e-16	2.49936e-12
rs10784774	12	69737879	YEATS4	9.72417e-16	2.5458e-12
rs17205511	12	10165849	CLEC12A	9.73891e-16	2.54884e-12
rs9872864	3	49792023	RBM6	9.93455e-16	2.59837e-12
rs778155	2	61647901	AHSA2	1.00598e-15	2.62437e-12
rs2592352	2	61665336	AHSA2	1.00598e-15	2.62437e-12
rs2421203	2	61669248	AHSA2	1.00598e-15	2.62437e-12
rs6042462	20	1448477	NSFL1C	1.00923e-15	2.63199e-12
rs1293743	12	113447572	OAS1	1.0149e-15	2.64593e-12
rs3763162	6	150140810	NUP43	1.01975e-15	2.65774e-12
rs4430924	2	61703856	AHSA2	1.02203e-15	2.66197e-12
rs12459746	19	38857085	C19orf33	1.02302e-15	2.66369e-12
rs7501812	17	17750907	SREBF1	1.0288e-15	2.67703e-12
rs11167280	20	34560526	CPNE1	1.05902e-15	2.75389e-12
rs2057649	19	18689830	C19orf60	1.08338e-15	2.81363e-12
rs11544338	2	203632510	FAM117B	1.08977e-15	2.82753e-12
rs12544041	8	79643639	FAM164A	1.09969e-15	2.85143e-12
rs11130218	3	49752372	RBM6	1.10439e-15	2.85997e-12
rs1049256	3	49763338	RBM6	1.10439e-15	2.85997e-12
rs2234391	3	49842625	RBM6	1.10439e-15	2.85997e-12
rs7644746	3	183596184	PARL	1.1098e-15	2.87307e-12
rs12532878	7	100212254	MOSPD3	1.11047e-15	2.87388e-12
rs34058624	17	57118121	RAD51C	1.11228e-15	2.8749e-12
rs2333409	17	57139134	RAD51C	1.11228e-15	2.8749e-12
rs34678056	17	57177549	RAD51C	1.11228e-15	2.8749e-12
rs7634902	3	49762662	RBM6	1.13196e-15	2.9239e-12
rs6775384	3	49853073	RBM6	1.13196e-15	2.9239e-12
rs2278406	19	9473229	ZNF266	1.15606e-15	2.98426e-12
rs9479094	6	150046219	NUP43	1.16317e-15	2.99786e-12
rs12526675	6	150050676	NUP43	1.16317e-15	2.99786e-12
rs10872646	6	150067675	NUP43	1.16317e-15	2.99786e-12
rs12528279	6	150072028	NUP43	1.16317e-15	2.99786e-12
rs10782316	6	150073891	NUP43	1.16317e-15	2.99786e-12
rs4047801	1	183415318	SMG7	1.16696e-15	3.00668e-12
rs10414250	19	9377716	ZNF266	1.17754e-15	3.03201e-12
rs10877011	12	58124992	FAM119B	1.18272e-15	3.04438e-12
rs9800736	6	149982417	NUP43	1.20396e-15	3.0961e-12
rs17435	23	153311980	CXorf12	1.21225e-15	3.11644e-12
rs929291	12	113444418	OAS1	1.2345e-15	3.14973e-12
rs3933343	9	34395816	NUDT2	1.26841e-15	3.23524e-12
rs2297256	21	40558421	HMGN1	1.28035e-15	3.26362e-12
rs6895641	5	64842825	SGTB	1.28768e-15	3.28129e-12
rs4761154	12	69705362	LYZ	1.29973e-15	3.30993e-12
rs10878964	12	69720691	LYZ	1.29973e-15	3.30993e-12
rs2076614	1	17413459	PADI2	1.30465e-15	3.32037e-12
rs2248273	1	156247907	C1orf85	1.30562e-15	3.32178e-12
rs663732	7	64739969	VKORC1L1	1.37141e-15	3.48263e-12
rs964611	15	48597514	DUT	1.38404e-15	3.51252e-12
rs7812123	7	100211556	MOSPD3	1.40974e-15	3.57662e-12
rs2694642	2	61596180	AHSA2	1.4444e-15	3.65994e-12
rs1048140	4	39478832	LIAS	1.44492e-15	3.65994e-12
rs9767123	6	149981459	NUP43	1.44574e-15	3.65994e-12
rs3924871	6	149983216	NUP43	1.44574e-15	3.65994e-12
rs3798761	6	150004779	NUP43	1.44574e-15	3.65994e-12
rs11155674	6	150032247	NUP43	1.44574e-15	3.65994e-12
rs11669128	19	9601155	ZNF266	1.51143e-15	3.82028e-12
rs12174349	6	150039148	NUP43	1.52014e-15	3.84112e-12
rs844887	20	23106084	THBD	1.5373e-15	3.88327e-12
rs3124779	9	136281966	MED22	1.5664e-15	3.95431e-12
rs6083828	20	25369918	PYGB	1.57498e-15	3.97351e-12
rs6564	1	28212975	RPA2	1.60119e-15	4.03336e-12
rs6565	1	28213157	RPA2	1.60119e-15	4.03336e-12
rs7356	1	28218100	RPA2	1.60119e-15	4.03336e-12
rs2474470	1	28234999	RPA2	1.60119e-15	4.03336e-12
rs2305641	12	69646914	LYZ	1.61769e-15	4.07366e-12
rs2303914	2	9983686	TAF1B	1.65997e-15	4.17884e-12
rs1045095	2	234203547	ATG16L1	1.67474e-15	4.21211e-12
rs6861	2	234204113	ATG16L1	1.67474e-15	4.21211e-12
rs17205511	12	10165849	CLEC12A	1.70135e-15	4.27639e-12
rs1384	12	69747834	YEATS4	1.72976e-15	4.34294e-12
rs2294758	6	133045812	VNN3	1.72997e-15	4.34294e-12
rs11596526	10	75847804	AP3M1	1.77858e-15	4.45672e-12
rs6431655	2	234162415	ATG16L1	1.8577e-15	4.65067e-12
rs11633336	15	48529940	DUT	1.89759e-15	4.74627e-12
rs11585570	1	53438130	SCP2	1.89764e-15	4.74627e-12
rs2267952	6	133067782	VNN3	1.91578e-15	4.78869e-12
rs9752321	2	3494374	Hs.467586	1.92475e-15	4.80962e-12
rs11764045	7	100212754	MOSPD3	1.94586e-15	4.8594e-12
rs1997164	7	102068619	ORAI2	1.94934e-15	4.86659e-12
rs7020	20	25278600	PYGB	2.02488e-15	5.04742e-12
rs13178332	5	57830080	GAPT	2.0373e-15	5.07525e-12
rs13184971	5	81233027	ATG10	2.04311e-15	5.08819e-12
rs7602496	2	203602207	FAM117B	2.08435e-15	5.18454e-12
rs5945751	23	102236801	BEX4	2.09465e-15	5.20537e-12
rs17881019	10	101946432	PKD2L1	2.1665e-15	5.35605e-12
rs12770784	10	101989510	PKD2L1	2.1665e-15	5.35605e-12
rs7073610	10	102006625	PKD2L1	2.1665e-15	5.35605e-12
rs3108680	1	107572997	PRMT6	2.18234e-15	5.39357e-12
rs2488088	10	76498953	ADK	2.1964e-15	5.42502e-12
rs1858828	3	50242387	RBM6	2.22713e-15	5.49593e-12
rs2240259	17	56458129	RAD51C	2.24147e-15	5.52795e-12
rs6947435	7	102032718	ORAI2	2.2488e-15	5.53931e-12
rs1983476	7	102065322	ORAI2	2.2488e-15	5.53931e-12
rs6050567	20	25354561	PYGB	2.2604e-15	5.56282e-12
rs1047171	20	25428786	PYGB	2.2604e-15	5.56282e-12
rs6050632	20	25432601	PYGB	2.2604e-15	5.56282e-12
rs1858086	5	57794296	GAPT	2.33703e-15	5.74444e-12
rs2291067	19	36273534	U2AF1L4	2.36647e-15	5.81152e-12
rs1874883	3	134205071	CEP63	2.38513e-15	5.84852e-12
rs1498718	3	134205920	CEP63	2.38513e-15	5.84852e-12
rs3932818	3	134206069	CEP63	2.38513e-15	5.84852e-12
rs17361749	1	46806480	NSUN4	2.42531e-15	5.94344e-12
rs931750	19	38818751	C19orf33	2.52589e-15	6.17687e-12
rs11673222	19	38824344	C19orf33	2.52589e-15	6.17687e-12
rs4853700	2	191264390	MFSD6	2.53827e-15	6.20529e-12
rs2295281	1	12059412	PLOD1	2.54728e-15	6.22545e-12
rs2157472	22	38251686	TRIOBP	2.576e-15	6.29373e-12
rs138785	22	35724659	TOM1	2.59491e-15	6.33804e-12
rs2168029	12	69734641	YEATS4	2.62684e-15	6.40446e-12
rs3736947	10	114169190	ACSL5	2.67671e-15	6.52018e-12
rs9646748	2	191301368	MFSD6	2.69367e-15	6.5556e-12
rs7564829	2	191305647	MFSD6	2.69367e-15	6.5556e-12
rs13409841	2	191318776	MFSD6	2.69367e-15	6.5556e-12
rs8624	10	114187787	ACSL5	2.87113e-15	6.97495e-12
rs6508121	18	21622632	Hs.579530	2.93367e-15	7.11411e-12
rs10744034	12	7880551	CLEC4C	2.99024e-15	7.24698e-12
rs11113426	12	108056596	PWP1	3.01194e-15	7.29739e-12
rs4760171	12	58225904	FAM119B	3.11193e-15	7.52841e-12
rs6512577	20	47865784	LOC100132096	3.19152e-15	7.7049e-12
rs2302479	7	150488616	TMEM176A	3.26735e-15	7.8786e-12
rs6079325	20	1467917	NSFL1C	3.37002e-15	8.11894e-12
rs11761199	7	128581835	IRF5	3.40404e-15	8.19604e-12
rs4819236	21	47739146	C21orf57	3.43997e-15	8.28009e-12
rs9841212	3	134191938	CEP63	3.489e-15	8.3857e-12
rs1863913	3	134200205	CEP63	3.489e-15	8.3857e-12
rs9814567	3	134218557	CEP63	3.489e-15	8.3857e-12
rs9809619	3	134280948	CEP63	3.489e-15	8.3857e-12
rs4148436	13	95899607	ABCC4	3.50795e-15	8.42624e-12
rs2892716	13	95899643	ABCC4	3.50795e-15	8.42624e-12
rs9500	1	33324136	S100PBP	3.57906e-15	8.59452e-12
rs553877	9	136214955	MED22	3.70427e-15	8.86374e-12
rs12763	9	136227260	MED22	3.70427e-15	8.86374e-12
rs11667640	19	45379791	PVRL2	3.72638e-15	8.91141e-12
rs1172294	2	25169200	ADCY3	3.82378e-15	9.12283e-12
rs3920702	9	71170130	PGM5	3.8816e-15	9.24992e-12
rs7914469	10	75786395	AP3M1	3.89593e-15	9.28135e-12
rs11145750	9	139259249	INPP5E	3.89884e-15	9.28556e-12
rs4869750	6	150177132	NUP43	3.94065e-15	9.3824e-12
rs6075351	20	18490913	DTD1	3.96659e-15	9.43862e-12
rs11206043	1	53402552	SCP2	4.1003e-15	9.73683e-12
rs2015190	10	26929728	PDSS1	4.10964e-15	9.7533e-12
rs1053593	22	35660875	TOM1	4.13056e-15	9.80008e-12
rs5945908	23	102191327	BEX4	4.15826e-15	9.86293e-12
rs7144747	14	35637511	KIAA0391	4.17324e-15	9.89556e-12
rs12946522	17	56768103	RAD51C	4.18291e-15	9.91559e-12
rs1735169	8	146067054	COMMD5	4.20285e-15	9.95996e-12
rs7717166	5	57803076	GAPT	4.20869e-15	9.97088e-12
rs11698601	20	34205035	CPNE1	4.22154e-15	9.98967e-12
rs2856	20	25433536	PYGB	4.35814e-15	1.02919e-11
rs4793954	17	56629527	TRIM37	4.36972e-15	1.03133e-11
rs11037858	11	44110690	PHACS	4.37789e-15	1.03296e-11
rs11264467	1	156273061	PAQR6	4.41578e-15	1.04159e-11
rs10972072	9	34348743	NUDT2	4.56069e-15	1.07391e-11
rs10186325	2	61757721	AHSA2	4.6007e-15	1.08239e-11
rs11869909	17	5351791	RABEP1	4.71099e-15	1.10769e-11
rs3124781	9	136275313	MED22	4.72447e-15	1.11022e-11
rs934093	3	134195885	CEP63	4.8369e-15	1.13598e-11
rs10070522	5	57786110	GAPT	5.01478e-15	1.17674e-11
rs1599750	12	58242545	FAM119B	5.03307e-15	1.18035e-11
rs1108889	6	150166569	NUP43	5.14313e-15	1.20438e-11
rs7769115	6	150169932	NUP43	5.14313e-15	1.20438e-11
rs848515	2	36767257	FEZ2	5.14446e-15	1.20438e-11
rs4951788	1	33289388	S100PBP	5.14697e-15	1.20462e-11
rs11596526	10	75847804	ADK	5.27885e-15	1.23371e-11
rs6115191	20	25440478	PYGB	5.2989e-15	1.23769e-11
rs431579	20	25470056	PYGB	5.2989e-15	1.23769e-11
rs4759523	12	131315412	STX2	5.34336e-15	1.24735e-11
rs2001483	12	131318645	STX2	5.34336e-15	1.24735e-11
rs2836934	21	40564885	HMGN1	5.39938e-15	1.25898e-11
rs8130320	21	40580258	HMGN1	5.39938e-15	1.25898e-11
rs11264467	1	156273061	PAQR6	5.40421e-15	1.25975e-11
rs10057028	5	57795822	GAPT	5.46395e-15	1.27331e-11
rs4886791	15	76596250	ETFA	5.51503e-15	1.28484e-11
rs12669824	7	150483512	ABP1	5.55062e-15	1.29277e-11
rs7934793	11	2923091	SLC22A18	5.67032e-15	1.31913e-11
rs138727	22	35694893	TOM1	5.68047e-15	1.32111e-11
rs3173833	7	150491084	TMEM176A	5.75784e-15	1.33758e-11
rs4759187	12	56075263	RDH5	5.78289e-15	1.34301e-11
rs2461870	15	76813920	ISL2	5.85505e-15	1.35899e-11
rs2551928	2	208465778	FAM119A	5.86716e-15	1.36025e-11
rs1045780	2	208467150	FAM119A	5.86716e-15	1.36025e-11
rs2256941	2	208469184	FAM119A	5.86716e-15	1.36025e-11
rs2551949	2	208477852	FAM119A	5.86716e-15	1.36025e-11
rs7135092	12	69658330	LYZ	5.93558e-15	1.37572e-11
rs2227890	20	25260931	PYGB	5.9429e-15	1.37668e-11
rs7300266	12	69654187	LYZ	5.94483e-15	1.37668e-11
rs7308481	12	69659299	LYZ	5.94483e-15	1.37668e-11
rs8106959	19	36219525	U2AF1L4	5.95565e-15	1.37846e-11
rs6050626	20	25428261	PYGB	5.9559e-15	1.37846e-11
rs2075674	7	100225031	MOSPD3	5.96033e-15	1.3791e-11
rs4802327	19	38793319	C19orf33	6.0423e-15	1.39687e-11
rs650368	12	10134345	CLEC12A	6.06546e-15	1.40182e-11
rs1474558	22	35690183	TOM1	6.08219e-15	1.40529e-11
rs12917438	15	48639737	DUT	6.24085e-15	1.44154e-11
rs3732171	2	61749690	AHSA2	6.24843e-15	1.44288e-11
rs7316224	12	6638666	VAMP1	6.28034e-15	1.44983e-11
rs2836894	21	40496479	BRWD1	6.30111e-15	1.45422e-11
rs6425611	1	180127107	QSOX1	6.35597e-15	1.46646e-11
rs12769818	10	101915629	PKD2L1	6.64722e-15	1.53018e-11
rs2734647	23	153292180	CXorf12	6.77519e-15	1.55787e-11
rs329852	5	7943796	MTRR	6.79709e-15	1.56247e-11
rs1108268	22	35658022	TOM1	6.85596e-15	1.572e-11
rs4820189	22	35658225	TOM1	6.85596e-15	1.572e-11
rs1474557	22	35690179	TOM1	6.85596e-15	1.572e-11
rs4821392	22	35690532	TOM1	6.85596e-15	1.572e-11
rs138726	22	35694295	TOM1	6.85596e-15	1.572e-11
rs3132377	6	28885974	TRIM27	6.91101e-15	1.58373e-11
rs6942306	6	133055170	VNN3	6.9313e-15	1.58793e-11
rs11914302	3	167552548	LOC646168	6.94162e-15	1.58984e-11
rs6079325	20	1467917	NSFL1C	7.02597e-15	1.6078e-11
rs1671218	19	55554399	RDH13	7.11983e-15	1.62882e-11
rs12023438	1	156254358	PAQR6	7.22335e-15	1.64694e-11
rs6684514	1	156255456	PAQR6	7.22335e-15	1.64694e-11
rs12563631	1	156258953	PAQR6	7.22335e-15	1.64694e-11
rs10908494	1	156263097	PAQR6	7.22335e-15	1.64694e-11
rs10908495	1	156263940	PAQR6	7.22335e-15	1.64694e-11
rs10908496	1	156264000	PAQR6	7.22335e-15	1.64694e-11
rs12127403	1	156273346	PAQR6	7.22335e-15	1.64694e-11
rs10908498	1	156278175	PAQR6	7.22335e-15	1.64694e-11
rs10908502	1	156300082	PAQR6	7.22335e-15	1.64694e-11
rs12141236	1	156302575	PAQR6	7.22335e-15	1.64694e-11
rs11264475	1	156306918	PAQR6	7.22335e-15	1.64694e-11
rs12022657	1	156314147	PAQR6	7.22335e-15	1.64694e-11
rs7180254	15	101126923	LINS1	7.26369e-15	1.65474e-11
rs6135063	20	1463027	NSFL1C	7.46761e-15	1.69881e-11
rs9263871	6	31170528	PSORS1C3	7.63773e-15	1.73606e-11
rs875643	22	24233998	GSTT1	7.6467e-15	1.73664e-11
rs12663047	6	131960898	ARG1	7.78981e-15	1.76815e-11
rs6107027	20	25288632	PYGB	7.79925e-15	1.76881e-11
rs869358	20	25374674	PYGB	7.79925e-15	1.76881e-11
rs4423675	20	25402778	PYGB	7.79925e-15	1.76881e-11
rs161827	1	7982034	UTS2	7.82558e-15	1.77379e-11
rs161811	1	7999602	UTS2	7.82558e-15	1.77379e-11
rs6042354	20	1429135	NSFL1C	7.84713e-15	1.77769e-11
rs1044218	21	34821570	TMEM50B	7.90125e-15	1.78845e-11
rs2834224	21	34825318	TMEM50B	7.90125e-15	1.78845e-11
rs2638	5	94050447	ANKRD32	7.98413e-15	1.8052e-11
rs2180834	14	23440404	PRMT5	8.205e-15	1.85359e-11
rs4879785	9	34396346	NUDT2	8.26452e-15	1.86652e-11
rs7634902	3	49762662	UBA7	8.33063e-15	1.87936e-11
rs6775384	3	49853073	UBA7	8.33063e-15	1.87936e-11
rs7046236	9	71184769	PGM5	8.35409e-15	1.8836e-11
rs17205511	12	10165849	CLEC12B	8.49178e-15	1.91359e-11
rs7290156	22	38218637	TRIOBP	8.51651e-15	1.9181e-11
rs9305048	19	14879034	EMR2	8.55154e-15	1.92545e-11
rs2395943	6	42940673	GNMT	8.58735e-15	1.93298e-11
rs11130218	3	49752372	UBA7	8.67064e-15	1.94956e-11
rs1049256	3	49763338	UBA7	8.67064e-15	1.94956e-11
rs2234391	3	49842625	UBA7	8.67064e-15	1.94956e-11
rs2304176	19	38794895	C19orf33	8.7947e-15	1.97427e-11
rs10826179	10	60151026	TFAM	8.79509e-15	1.97427e-11
rs2250818	7	100422156	EPHB4	8.91042e-15	1.9985e-11
rs4711666	6	41220080	TREML3	8.96369e-15	2.00989e-11
rs588361	11	126084834	FOXRED1	9.21374e-15	2.06425e-11
rs2284555	21	34806288	TMEM50B	9.36361e-15	2.09552e-11
rs1059293	21	34809693	TMEM50B	9.36361e-15	2.09552e-11
rs4775748	15	48638795	DUT	9.47711e-15	2.12033e-11
rs10957898	8	79617313	FAM164A	9.48565e-15	2.12166e-11
rs703225	13	33042802	PFAAP5	9.54964e-15	2.13538e-11
rs2274064	1	183542387	SMG7	9.58405e-15	2.14249e-11
rs12921817	16	84076589	HSDL1	9.61508e-15	2.14883e-11
rs4766500	12	110993791	C12orf24	9.69474e-15	2.16604e-11
rs562641	1	53374666	SCP2	9.71025e-15	2.16891e-11
rs6662844	1	183494453	SMG7	9.83776e-15	2.19558e-11
rs789172	1	183509238	SMG7	9.83776e-15	2.19558e-11
rs11811630	1	183533910	SMG7	9.83776e-15	2.19558e-11
rs7309141	12	110587637	C12orf24	1.00415e-14	2.23859e-11
rs7093667	10	105080575	USMG5	1.03312e-14	2.2994e-11
rs10883855	10	105092447	USMG5	1.03312e-14	2.2994e-11
rs2836900	21	40499166	BRWD1	1.0528e-14	2.33871e-11
rs2267952	6	133067782	VNN2	1.083e-14	2.40449e-11
rs7427492	3	134261654	CEP63	1.08707e-14	2.41273e-11
rs13432396	2	203469588	FAM117B	1.10586e-14	2.4492e-11
rs13120456	4	76809074	NAAA	1.1117e-14	2.46147e-11
rs7086415	10	76459669	ADK	1.11917e-14	2.47666e-11
rs2395097	10	76461188	ADK	1.11917e-14	2.47666e-11
rs609261	11	108158134	ATM	1.15055e-14	2.54332e-11
rs7931930	11	108268286	ATM	1.15055e-14	2.54332e-11
rs12450199	17	78076592	GAA	1.15415e-14	2.5506e-11
rs9453	14	100808845	SLC25A29	1.15722e-14	2.55599e-11
rs1009812	14	100820980	SLC25A29	1.15722e-14	2.55599e-11
rs3768013	1	150815411	ARNT	1.18558e-14	2.6165e-11
rs2188151	3	50201924	RBM6	1.19338e-14	2.63085e-11
rs2518796	3	50207075	RBM6	1.19338e-14	2.63085e-11
rs1005678	3	50210289	RBM6	1.19338e-14	2.63085e-11
rs619972	11	108169619	ATM	1.20164e-14	2.64763e-11
rs479624	12	10121347	CLEC12A	1.2349e-14	2.71869e-11
rs228591	11	108097333	ATM	1.2395e-14	2.72587e-11
rs599558	11	108177538	ATM	1.2395e-14	2.72587e-11
rs4585	11	108239628	ATM	1.2395e-14	2.72587e-11
rs227077	11	108253252	ATM	1.2395e-14	2.72587e-11
rs4775754	15	48661343	DUT	1.27986e-14	2.8098e-11
rs17205511	12	10165849	CLEC12A	1.28128e-14	2.81166e-11
rs2241876	2	234186734	ATG16L1	1.29051e-14	2.83038e-11
rs7581038	2	143627604	KYNU	1.29235e-14	2.8335e-11
rs2836906	21	40504502	BRWD1	1.29263e-14	2.8335e-11
rs6517175	21	34857840	TMEM50B	1.29783e-14	2.84413e-11
rs526157	12	10123677	CLEC12A	1.33056e-14	2.91428e-11
rs209131	6	28867755	TRIM27	1.35804e-14	2.97207e-11
rs209121	6	28881660	TRIM27	1.35804e-14	2.97207e-11
rs1061625	6	28891458	TRIM27	1.35804e-14	2.97207e-11
rs4729789	7	102096361	ORAI2	1.37986e-14	3.01739e-11
rs17482440	2	61548857	AHSA2	1.39013e-14	3.03739e-11
rs3171389	20	34636281	CPNE1	1.42752e-14	3.11489e-11
rs6912843	6	28904162	TRIM27	1.43579e-14	3.1321e-11
rs11764558	7	26778732	SKAP2	1.4505e-14	3.16334e-11
rs9964798	18	21587322	TTC39C	1.45312e-14	3.16736e-11
rs11070629	15	48528113	DUT	1.48694e-14	3.23933e-11
rs12023438	1	156254358	PAQR6	1.4932e-14	3.24253e-11
rs6684514	1	156255456	PAQR6	1.4932e-14	3.24253e-11
rs12563631	1	156258953	PAQR6	1.4932e-14	3.24253e-11
rs10908494	1	156263097	PAQR6	1.4932e-14	3.24253e-11
rs10908495	1	156263940	PAQR6	1.4932e-14	3.24253e-11
rs10908496	1	156264000	PAQR6	1.4932e-14	3.24253e-11
rs12127403	1	156273346	PAQR6	1.4932e-14	3.24253e-11
rs10908498	1	156278175	PAQR6	1.4932e-14	3.24253e-11
rs10908502	1	156300082	PAQR6	1.4932e-14	3.24253e-11
rs12141236	1	156302575	PAQR6	1.4932e-14	3.24253e-11
rs11264475	1	156306918	PAQR6	1.4932e-14	3.24253e-11
rs12022657	1	156314147	PAQR6	1.4932e-14	3.24253e-11
rs1439875	2	143638569	KYNU	1.49909e-14	3.25445e-11
rs1631637	9	117076684	ORM1	1.50703e-14	3.27082e-11
rs8039653	15	48572635	DUT	1.53707e-14	3.33246e-11
rs4907870	23	102327240	BEX4	1.53989e-14	3.33679e-11
rs5987668	23	102329261	BEX4	1.53989e-14	3.33679e-11
rs11589458	1	150792616	ARNT	1.54149e-14	3.33937e-11
rs2015190	10	26929728	PDSS1	1.54726e-14	3.35098e-11
rs9436748	1	65911672	LEPROT	1.5703e-14	3.39996e-11
rs1163085	10	105039241	USMG5	1.606e-14	3.47448e-11
rs11264467	1	156273061	C1orf85	1.6071e-14	3.47594e-11
rs13120456	4	76809074	NAAA	1.6306e-14	3.52301e-11
rs6676158	1	28257209	RPA2	1.6341e-14	3.52869e-11
rs7211963	17	74696446	MXRA7	1.65523e-14	3.56958e-11
rs4819236	21	47739146	C21orf57	1.65799e-14	3.57458e-11
rs6517522	21	40553845	BRWD1	1.66064e-14	3.57697e-11
rs2240775	17	74710128	MXRA7	1.66607e-14	3.58061e-11
rs2240774	17	74710572	MXRA7	1.66607e-14	3.58061e-11
rs2286585	17	74712310	MXRA7	1.66607e-14	3.58061e-11
rs9322193	6	149919143	NUP43	1.67573e-14	3.59661e-11
rs7743193	6	2970568	SERPINB6	1.67933e-14	3.60338e-11
rs6910087	6	31377047	LOC100129668	1.69243e-14	3.63052e-11
rs10188449	2	3480366	Hs.467586	1.71262e-14	3.67189e-11
rs4821717	22	38216758	TRIOBP	1.7296e-14	3.70635e-11
rs7290169	22	38218701	TRIOBP	1.7296e-14	3.70635e-11
rs4964607	12	108073695	PWP1	1.73446e-14	3.71577e-11
rs6776999	3	183592567	PARL	1.78281e-14	3.81534e-11
rs650368	12	10134345	CLEC12A	1.78551e-14	3.82011e-11
rs4534357	1	168167139	TIPRL	1.80178e-14	3.85391e-11
rs1735433	8	146050996	COMMD5	1.82345e-14	3.89718e-11
rs3898352	15	76521770	ETFA	1.82433e-14	3.89804e-11
rs1426721	15	48670608	DUT	1.82584e-14	3.90025e-11
rs11756237	6	7470321	RIOK1	1.83953e-14	3.92741e-11
rs1001179	11	34460231	CAT	1.8411e-14	3.92973e-11
rs7543083	1	47031340	MOBKL2C	1.84824e-14	3.94394e-11
rs9872864	3	49792023	UBA7	1.85953e-14	3.96595e-11
rs12199530	6	7444223	RIOK1	1.86766e-14	3.98225e-11
rs7914469	10	75786395	ADK	1.87044e-14	3.98503e-11
rs11120002	1	212889867	NSL1	1.8754e-14	3.99454e-11
rs4895943	6	133052616	VNN3	1.89234e-14	4.02958e-11
rs2834210	21	34786574	TMEM50B	1.90104e-14	4.04704e-11
rs1889740	1	150799755	ARNT	1.93169e-14	4.10799e-11
rs2228099	1	150808889	ARNT	1.93169e-14	4.10799e-11
rs2864873	1	150814174	ARNT	1.93169e-14	4.10799e-11
rs7532045	1	150821847	ARNT	1.93169e-14	4.10799e-11
rs4660234	1	43319272	ERMAP	1.99557e-14	4.23497e-11
rs6685920	1	43321476	ERMAP	1.99557e-14	4.23497e-11
rs9903295	17	57297161	RAD51C	2.00632e-14	4.25666e-11
rs12609505	19	18674057	C19orf60	2.01392e-14	4.26945e-11
rs3761034	19	18680478	C19orf60	2.01392e-14	4.26945e-11
rs9646748	2	191301368	MFSD6	2.02722e-14	4.29427e-11
rs7564829	2	191305647	MFSD6	2.02722e-14	4.29427e-11
rs13409841	2	191318776	MFSD6	2.02722e-14	4.29427e-11
rs543240	1	28596084	ATPIF1	2.06668e-14	4.37443e-11
rs12311063	12	110557312	GPN3	2.11896e-14	4.48394e-11
rs6966770	7	115895718	TES	2.1273e-14	4.49807e-11
rs2896181	7	115897884	TES	2.1273e-14	4.49807e-11
rs2302055	19	18684563	C19orf60	2.14462e-14	4.5335e-11
rs1543358	1	168131592	TIPRL	2.16012e-14	4.56509e-11
rs10177225	2	61594498	AHSA2	2.17692e-14	4.5978e-11
rs4870139	6	149896318	NUP43	2.18341e-14	4.60952e-11
rs2186366	22	24254113	GSTT1	2.21112e-14	4.66559e-11
rs6664314	1	59056326	TACSTD2	2.2267e-14	4.69602e-11
rs7097428	10	114105294	ACSL5	2.3082e-14	4.85907e-11
rs7262824	20	18483105	DTD1	2.32718e-14	4.89649e-11
rs1044213	21	34821691	TMEM50B	2.33454e-14	4.9107e-11
rs1000768	11	34513932	CAT	2.37122e-14	4.98656e-11
rs2071596	6	31506691	LST1	2.40608e-14	5.05595e-11
rs6929796	6	31522669	LST1	2.40608e-14	5.05595e-11
rs12713435	2	61499789	AHSA2	2.42893e-14	5.10133e-11
rs9903295	17	57297161	RAD51C	2.4757e-14	5.19333e-11
rs519380	11	66409409	CCS	2.48141e-14	5.20347e-11
rs910620	20	1425078	NSFL1C	2.51283e-14	5.25851e-11
rs12958534	18	34543395	C18orf10	2.56596e-14	5.36416e-11
rs10872397	6	133048213	VNN3	2.69435e-14	5.62388e-11
rs1476788	17	74697528	MXRA7	2.70239e-14	5.63777e-11
rs1531916	15	48526271	DUT	2.70637e-14	5.64461e-11
rs2231828	11	34502345	CAT	2.71624e-14	5.66375e-11
rs3920702	9	71170130	PGM5	2.71892e-14	5.66788e-11
rs7039505	9	123705945	LOC253039	2.73197e-14	5.69216e-11
rs2657445	5	102004743	PAM	2.74856e-14	5.72379e-11
rs8063994	16	84120718	HSDL1	2.76362e-14	5.75367e-11
rs842252	3	16299968	DPH3	2.77617e-14	5.77832e-11
rs886090	9	136199503	SURF6	2.78112e-14	5.78715e-11
rs13387729	2	25076126	DNAJC27	2.83407e-14	5.89431e-11
rs2092039	23	102324117	BEX4	2.8385e-14	5.89898e-11
rs2657445	5	102004743	Hs.482960	2.87159e-14	5.96622e-11
rs4729789	7	102096361	POLR2J	2.94456e-14	6.10846e-11
rs7514577	1	12024235	MFN2	2.95617e-14	6.13098e-11
rs2017022	22	38213383	TRIOBP	2.96155e-14	6.139e-11
rs3105477	5	101953047	Hs.482960	3.02089e-14	6.25882e-11
rs1189553	10	76468851	ADK	3.06662e-14	6.34708e-11
rs10888391	1	150729983	ARNT	3.18646e-14	6.58005e-11
rs11204726	1	150743492	ARNT	3.18646e-14	6.58005e-11
rs10888394	1	150749913	ARNT	3.18646e-14	6.58005e-11
rs10888395	1	150762171	ARNT	3.18646e-14	6.58005e-11
rs4319334	1	150766822	ARNT	3.18646e-14	6.58005e-11
rs4414157	10	75808313	ADK	3.22001e-14	6.64595e-11
rs3743890	16	456416	NME4	3.25388e-14	6.71415e-11
rs3861909	1	107544176	PRMT6	3.33827e-14	6.87431e-11
rs12912107	15	48520590	DUT	3.34913e-14	6.89491e-11
rs4253940	1	28263202	RPA2	3.35211e-14	6.8993e-11
rs3124781	9	136275313	SURF6	3.38861e-14	6.97089e-11
rs1006771	22	24314006	GSTT1	3.39523e-14	6.98146e-11
rs650368	12	10134345	CLEC12A	3.3978e-14	6.98451e-11
rs6767	2	3483205	Hs.467586	3.48359e-14	7.15071e-11
rs10782310	6	149943594	NUP43	3.4857e-14	7.15071e-11
rs12234128	6	149948689	NUP43	3.4857e-14	7.15071e-11
rs12529698	6	149972087	NUP43	3.4857e-14	7.15071e-11
rs11155671	6	149972132	NUP43	3.4857e-14	7.15071e-11
rs10985073	9	123643855	LOC253039	3.50457e-14	7.1829e-11
rs9886724	9	123665019	LOC253039	3.50457e-14	7.1829e-11
rs1609810	9	123642351	LOC253039	3.51829e-14	7.19758e-11
rs881375	9	123652898	LOC253039	3.51829e-14	7.19758e-11
rs10435844	9	123668199	LOC253039	3.51829e-14	7.19758e-11
rs2239657	9	123671520	LOC253039	3.51829e-14	7.19758e-11
rs10733648	9	123700779	LOC253039	3.51829e-14	7.19758e-11
rs2001298	12	113478072	OAS1	3.53594e-14	7.23187e-11
rs9752760	2	3494562	Hs.467586	3.54415e-14	7.24682e-11
rs7021049	9	123683982	LOC253039	3.58169e-14	7.32174e-11
rs7320104	13	115059765	CDC16	3.59017e-14	7.33723e-11
rs2277862	20	34152782	CPNE1	3.62278e-14	7.40201e-11
rs778139	2	61684564	AHSA2	3.62445e-14	7.40358e-11
rs12117903	1	156311165	PAQR6	3.64283e-14	7.43924e-11
rs1177265	2	61338832	LOC339804	3.658e-14	7.46534e-11
rs1177290	2	61346133	LOC339804	3.658e-14	7.46534e-11
rs1002352	9	34399002	NUDT2	3.65837e-14	7.46534e-11
rs617956	12	10146236	CLEC12A	3.6691e-14	7.48535e-11
rs9927	20	25277244	PYGB	3.67982e-14	7.50535e-11
rs1204504	16	461762	NME4	3.69273e-14	7.52978e-11
rs2302055	19	18684563	UBA52	3.736e-14	7.6142e-11
rs4321399	2	3481659	Hs.467586	3.76687e-14	7.66942e-11
rs2806192	6	7476908	RIOK1	3.8463e-14	7.82524e-11
rs12477861	2	176789816	KIAA1715	3.86538e-14	7.86013e-11
rs678208	12	10142538	CLEC12A	3.93354e-14	7.99074e-11
rs1843839	18	21590236	TTC39C	3.95173e-14	8.02367e-11
rs6589006	11	108031295	ATM	3.9941e-14	8.10565e-11
rs1884391	20	1416066	NSFL1C	4.05546e-14	8.22195e-11
rs6478486	9	123655329	LOC253039	4.07432e-14	8.25607e-11
rs12609505	19	18674057	UBA52	4.09331e-14	8.29043e-11
rs3761034	19	18680478	UBA52	4.09331e-14	8.29043e-11
rs2070661	11	108043988	ATM	4.13101e-14	8.36052e-11
rs2330635	22	24251344	GSTT1	4.13546e-14	8.36745e-11
rs6135063	20	1463027	NSFL1C	4.15686e-14	8.40238e-11
rs11264463	1	156242806	PAQR6	4.30541e-14	8.69399e-11
rs12621733	2	176791642	KIAA1715	4.33424e-14	8.74351e-11
rs12622749	2	176792929	KIAA1715	4.33424e-14	8.74351e-11
rs12622783	2	176793016	KIAA1715	4.33424e-14	8.74351e-11
rs12621889	2	176846592	KIAA1715	4.33424e-14	8.74351e-11
rs1133790	7	99632982	TRIM4	4.41087e-14	8.89368e-11
rs2425173	20	34445142	CPNE1	4.44383e-14	8.95792e-11
rs4964607	12	108073695	PRDM4	4.48244e-14	9.02901e-11
rs12747251	1	212903089	NSL1	4.49178e-14	9.04559e-11
rs11623624	14	23406108	PRMT5	4.55235e-14	9.1653e-11
[truncated: 13,721 more rows]
