# Supplementary material for: Integration Analysis of m6A-SNPs and eQTLs Associated With Sepsis Reveals Platelet Degranulation and Staphylococcus aureus Infection are Mediated by m6A mRNA Methylation
Source: Front Genet. 2020 Feb 26;11:7. doi: 10.3389/fgene.2020.00007 (PMC7054457; doi:10.3389/fgene.2020.00007)
Supplement: Supplementary file 2 [file Table_2.xlsx]

## Sheet: Table S2
Table S2. m6A-eQTLs associated with sepsis and controllers of m66A modification such as writers, erasers and readers
SNP	Chromosome	Position	Probe	Gene	beta	t-stat	p value	FDR
rs7464	8	64124956	4150240	YTHDF3	-0.0682058	-3.73518	0.000242232	0.0486929
rs1833678	5	112853189	150605	YTHDC2	0.269245	5.32255	2.6405e-07	0.000148345
rs7730949	5	112930203	150605	YTHDC2	0.256377	5.28146	3.21962e-07	0.000176558
rs7713451	5	112930565	150605	YTHDC2	0.256377	5.28146	3.21962e-07	0.000176558
rs2914177	5	112973977	150605	YTHDC2	0.250172	5.15475	5.89351e-07	0.000302367
rs6594721	5	112829305	150605	YTHDC2	0.245804	5.12585	6.75497e-07	0.000340905
rs6594732	5	112868693	150605	YTHDC2	0.245804	5.12585	6.75497e-07	0.000340905
rs6864369	5	112916780	150605	YTHDC2	0.244516	5.06152	9.13409e-07	0.000445021
rs11748794	5	112917278	150605	YTHDC2	0.244516	5.06152	9.13409e-07	0.000445021
rs6594718	5	112790404	150605	YTHDC2	0.241945	5.02371	1.08929e-06	0.0005191
rs10076131	5	112942820	150605	YTHDC2	0.221503	4.75731	3.66564e-06	0.00150321
rs2091803	5	112578543	150605	YTHDC2	0.224568	4.65912	5.66356e-06	0.00219971
rs2303717	5	112926982	150605	YTHDC2	-0.166734	-4.48216	1.21971e-05	0.00424603
rs9552	5	112929694	150605	YTHDC2	-0.166643	-4.47573	1.25368e-05	0.00434586
rs6886628	5	112899702	150605	YTHDC2	0.216462	4.43771	1.47381e-05	0.00498495
rs4705812	5	112674497	150605	YTHDC2	0.157536	4.33353	2.2838e-05	0.00722774
rs17135597	5	112719722	150605	YTHDC2	0.233213	4.18629	4.18493e-05	0.0119734
rs3906371	5	112842992	150605	YTHDC2	0.160348	4.14973	4.85215e-05	0.0135084
rs27566	5	112739130	150605	YTHDC2	-0.149846	-3.98512	9.33028e-05	0.0229937
rs13190054	5	112615044	150605	YTHDC2	0.143924	3.86915	0.000146114	0.032841
rs2914200	5	112945992	150605	YTHDC2	-0.147148	-3.76696	0.000215123	0.0444183
